# Supplementary material for: Increased biomass and carbon burial 2 billion years ago triggered mountain building
Source: Springer Nature journal article supplement (doi:10.1038/s43247-021-00313-5), 2021-11-26
Supplement: 43247_2021_313_MOESM1_ESM.pdf [file 43247_2021_313_MOESM1_ESM.pdf]

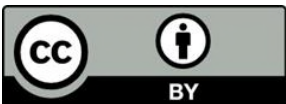

**Open Access** This file is licensed under a Creative Commons Attribution 4.0 International License, which permits use, sharing, adaptation, distribution and reproduction in any medium or format, as long as you give appropriate credit to the original author(s) and the source, provide a link to the Creative Commons license, and indicate if changes were made. In the cases where the authors are anonymous, such as is the case for the reports of anonymous peer reviewers, author attribution should be to 'Anonymous Referee' followed by a clear attribution to the source work. The images or other third party material in this file are included in the article's Creative Commons license, unless indicated otherwise in a credit line to the material. If material is not included in the article's Creative Commons license and your intended use is not permitted by statutory regulation or exceeds the permitted use, you will need to obtain permission directly from the copyright holder. To view a copy of this license, visit <http://creativecommons.org/licenses/by/4.0/>.

*Web links to the author's journal account have been redacted from the decision letters as indicated to maintain confidentiality.*

3rd Sep 21

Dear Dr. Parnell,

Please allow me to apologise for the delay in sending a decision on your manuscript titled "Elevated biomass at 2 Ga triggered mountain building". It has now been seen by 2 reviewers, and I include their comments at the end of this message.

As you will see, they find your work novel and of interest to the geosciences community, and provide some relatively minor suggestions for improvements that we would like you to address. I fully agree with the reviewers and we are interested in the possibility of publishing your study in Communications Earth & Environment, but would like to assess a revised manuscript before we make a final decision on publication.

We therefore invite you to revise and resubmit your manuscript. Please highlight all changes in the manuscript text file.

We are committed to providing a fair and constructive peer-review process. Please don't hesitate to contact us if you wish to discuss the revision in more detail.

Please use the following link to submit your revised manuscript, point-by-point response to the referees' comments (which should be in a separate document to any cover letter) and the completed checklist:

[link redacted]

\*\* This url links to your confidential home page and associated information about manuscripts you may have submitted or be reviewing for us. If you wish to forward this email to co-authors, please delete the link to your homepage first \*\*

We hope to receive your revised paper within six weeks; please let us know if you aren't able to submit it within this time so that we can discuss how best to proceed. If we don't hear from you, and the revision process takes significantly longer, we may close your file. In this event, we will still be happy to reconsider your paper at a later date, as long as nothing similar has been accepted for publication at Communications Earth & Environment or published elsewhere in the meantime.

We understand that due to the current global situation, the time required for revision may be longer than usual. We would appreciate it if you could keep us informed about an estimated timescale for resubmission, to facilitate our planning. Of course, if you are unable to estimate, we are happy to accommodate necessary extensions nevertheless.

Please do not hesitate to contact me if you have any questions or would like to discuss these revisions further. We look forward to seeing the revised manuscript and thank you for the opportunity to review your work.

Best regards,

Joao Duarte, PhD  
Editorial Board Member

Communications Earth & Environment  
orcid.org/0000-0001-7505-3690

Joe Aslin  
Associate Editor  
Communications Earth & Environment

#### EDITORIAL POLICIES AND FORMATTING

We ask that you ensure your manuscript complies with our editorial policies. Please ensure that the following formatting requirements are met, and any checklist relevant to your research is completed and uploaded as a Related Manuscript file type with the revised article.

Editorial Policy: [Policy requirements](https://www.nature.com/documents/nr-editorial-policy-checklist.zip)

Furthermore, please align your manuscript with our format requirements, which are summarized on the following checklist:

[Communications Earth & Environment formatting checklist](https://www.nature.com/documents/commsj-phys-style-formatting-checklist-article.pdf)

and also in our style and formatting guide [Communications Earth & Environment formatting guide](https://www.nature.com/documents/commsj-phys-style-formatting-guide-accept.pdf) .

**\*\*\* DATA:** Communications Earth & Environment endorses the principles of the Enabling FAIR data project (<http://www.copdess.org/enabling-fair-data-project/> ). We ask authors to make the data that support their conclusions available in permanent, publically accessible data repositories. (Please contact the editor if you are unable to make your data available).

All Communications Earth & Environment manuscripts must include a section titled "Data Availability" at the end of the Methods section or main text (if no Methods). More information on this policy, is available at <http://www.nature.com/authors/policies/data/data-availability-statements-data-citations.pdf>.

In particular, the Data availability statement should include:

- Unique identifiers (such as DOIs and hyperlinks for datasets in public repositories)
- Accession codes where appropriate
- If applicable, a statement regarding data available with restrictions
- If a dataset has a Digital Object Identifier (DOI) as its unique identifier, we strongly encourage including this in the Reference list and citing the dataset in the Data Availability Statement.

**DATA SOURCES:** All new data associated with the paper should be placed in a persistent repository where they can be freely and enduringly accessed. We recommend submitting the data to discipline-specific, community-recognized repositories, where possible and a list of recommended repositories is provided at [http://www.nature.com/sdata/policies/](http://www.nature.com/sdata/policies/repositories)

repositories</a>.

If a community resource is unavailable, data can be submitted to generalist repositories such as <a href="https://figshare.com/">figshare</a> or <a href="http://datadryad.org/">Dryad Digital Repository</a>. Please provide a unique identifier for the data (for example a DOI or a permanent URL) in the data availability statement, if possible. If the repository does not provide identifiers, we encourage authors to supply the search terms that will return the data. For data that have been obtained from publically available sources, please provide a URL and the specific data product name in the data availability statement. Data with a DOI should be further cited in the methods reference section.

Please refer to our data policies at <a href="http://www.nature.com/authors/policies/availability.html">http://www.nature.com/authors/policies/availability.html</a>.

#### REVIEWER COMMENTS:

Reviewer #1 (Remarks to the Author):

Review of: COMMSENV-21-0396-T

By: Michael Brown

This paper proposes that increase in carbon in passive margin sedimentary sequences consequent upon the GOE facilitated Paleoproterozoic mountain building. I found the paper novel and of interest; it should be of interest to the community at large. The study is convincing and the paper will influence conceptual understanding about mountain building processes.

My comments below are keyed by page/line number (I converted the pdf to a Word docx file; the pages/lines do not match perfectly, but a copy of the docx file is appended).

2/1-3. The first two sentences are highly unlikely to be correct (indeed, your own Figure 3 shows collision occurring before or by 2.1 Ga). It is the breakup of several supercratons in the early Paleoproterozoic that provide the passive margins along the trailing edges of cratons where organic carbon was buried prior to incorporation in the collisional orogens that suture Nuna and, eventually, Columbia. So, the logic must be that plate tectonics (i.e. a fragmented rigid lithosphere and a network of weak plate boundaries, with motion driven by stable subduction) had emerged by, say, c. 2.2 Ga or slightly earlier. The diachronous stabilization of cratons from c. 3.1 to c. 2.4 Ga or so and the 'mixed' signals in various geological datasets during that period suggest (to this reviewer) that the period down to c. 2.4 Ga or so was one of transition from the pre-plate tectonics mode to the present (global) plate tectonics mode (consistent with the (slightly tongue-in-cheek) 1 Ga transition proposed by Bercovici and Ricard, 2014, Nature). See Brown et al., 2020, AnnRevEarthPlanetSci, for discussion. I doubt that supercraton breakup, stable subduction and craton drift have anything (much) to do with the rise of oxygen, but these steps must precede (even if not by much) the consequent burial of organic carbon.

2/15 Suggest delete "continental"

2/17 Suggest delete "plate tectonics, and" (or modify with an addition sentence)

2/19 Take care with "an increase in the production of continental crust as recorded by zircon ages"! First, the oldest (double) peak in zircon ages is in the Neoproterozoic. Second, the debate about production vs preservation goes back to Hawkesworth et al., 2009, Science, and is not resolved. I suggest you simply leave out this clause.

2/21-22 In the references, Weller & St Onge is a study of a single eclogite boudin (it is set in a global context in their Figure 6 using the dataset of Brown, 2014). So, similar to the compilation of seismic images from multiple orogens by Wan et al., 2020, a reference to the most recent global dataset and discussion would be more appropriate (Brown and Johnson, 2019, American Mineralogist).

2/28 Plate tectonics must precede the development of high biomass (discussed above).

4/5 To avoid duplication, I would replace the first use of "exceptional" with "collisional"

4/25 Suggest "marble" --> "carbonate"

5/10 Figure 5G in Zhu et al. is based on the dataset of Brown and Johnson (2019, Mineralogical Magazine), and the peak in the 30 pt moving mean in the Paleoproterozoic is determined by 2 outliers at 7 GPa. These are 2 of 4 data that record low T/P conditions (i.e. blueschists, low-T eclogites and UHP metamorphism) prior to the late Tonian, and low T/P metamorphism relates to subduction rather than to collision. The moving mean of P for collision-related metamorphism is shown in the top panel of Figure 11 in Brown and Johnson (2019, Mineralogical Magazine). There is an gradual increase of P in the Paleoproterozoic.

6/2-4 Widespread orogeny is driven by plate tectonics that amalgamated the cratons into Nuna and, eventually, Columbia. The modern style of orogenesis is facilitated by the "abundant carbon"!

8/6-10. This is an overinterpretation of the data that this reviewer cannot follow. Of the 7 localities for which P-T paths are shown in Supp. Fig. 6, only 2 appear to involve a younger event (Korea and Algeria). Of the other 5, 4 show P-T paths consistent with 'normal' rates of exhumation for the Paleoproterozoic, but I could not confirm the 5th (Trans-Hudson), which does not seem to come from the reference quoted (Skipton et al., 2017). This figure does not seem to provide strong support for the point the authors are trying to make.

Reviewer #2 (Remarks to the Author):

COMMSENV-21-0396-T  
Parnell and Brolly  
CEE

Review by Ross N. Mitchell, Ph.D. ross.mitchell@mail.iggcas.ac.cn

The authors claim a peak in marine biomass at ca. 2.1–2.0 Ga (Lomagundi–Jatuli positive  $\delta^{13}\text{C}$  excursion and shungite deposits to follow) helped facilitate the immediately subsequent impressive

orogenic peak of the Orosirian Period. Although I was compelled by the spatiotemporal link between the carbon-rich sediments indeed showing up as graphite in Orosirian orogens, I initially had my doubts about their being a causal link between the two phenomena. But the authors have won me over in their diligent approach to testing their fascinating hypothesis and any way they can think of. Surely others will find other means to do so upon reading this intriguing work once it is published.

This is a fascinating and well-executed paper that should be published as soon as possible. The authors build off their recent compilation work (Parnell+21\_Geo-Mag) to devise an incredible hypothesis. Unbelievably, they even seem to back it up with impressive knowledge of the relevant literature and exposition in effective figures and tables. I have made edits in the annotated PDF that hopefully improve the otherwise already excellent paper. My recommendation is thus to accept pending minor revisions. Some additional suggestions that might improve the paper are offered below too.

The abstract is good, but I'm not sure it does full justice to the depth of research the authors have done into the specific feasibility of the mechanism they propose. I know you want to be as broad/general as possible, but for those who will be immediately skeptical that spatiotemporal link doesn't mean a causative link (I had my doubts at first too!), a little more "meat on the bone" upfront might be nice. Consider editing the abstract a bit.

Figure 2: The time axis in figure 2 runs the opposite way to those in Figures 3 and 4 and it should be consistent. I personally prefer adopting the time moving forward to the right as in Figures 3 and 4.

Figure 3: To make a stronger visual link between the sediment and orogen phase for each place, I'd recommend leaving no space between these two bars for each place (i.e., red right below blue without any space between the two records for each place).

Supp Figure 3: Neat figure. quite convincing. if not published before, perhaps consider including in the main text?

Supp Figure 5: To make a stronger visual link between the two sources for each place, I'd recommend leaving no space between these two bars for each place (i.e., red right below black without any space between the two records for each place).

1 **Elevated biomass at 2 Ga triggered mountain building**

2 **J. Parnell\*, C. Brolly**

3 **School of Geosciences, University of Aberdeen, Aberdeen AB24 3UE, United Kingdom**

4 **\*J.Parnell@abdn.ac.uk**

5



1 **The geological record following the c. 2.3 Ga Great Oxidation Event includes evidence for an**  
2 **anomalously high burial of organic carbon, and the emergence of modern plate tectonics. Both**  
3 **occurred globally over the period 2.1 to 1.8 Ga. In numerous orogens, highly carbonaceous**  
4 **sediments focussed deformation by thrusting, folding and shearing. Here an assessment of the**  
5 **timing of Palaeoproterozoic carbon burial and peak deformation/metamorphism shows that**  
6 **orogeny consistently occurred less than 200 Myr after sedimentation, in a time frame comparable**  
7 **to that of orogens through the Phanerozoic. This implies that the high carbon burial played a key**  
8 **role in lubricating compressive deformation, and it allowed the crustal thickening that built**  
9 **Palaeoproterozoic mountain belts. Further, this episode left a legacy of weakening and**  
10 **deformation in 2 Gyr-old crust, which has supported orogeny up to the building of the Himalayas**  
11 **today.**

12  
13  
14  
15 Orogeny involves the building of continental mountains by plate tectonic processes in which the  
16 lithosphere is deformed under compression. Several lines of evidence mark the Palaeoproterozoic as  
17 the time when plate tectonics, and mountain building, commenced in the form which has continued  
18 to the present day. This is evident in a rapid increase in the frequency of collisional orogens, an  
19 increase in the production of continental crust as recorded by zircon ages, the earliest large lateral  
20 plate motions, the earliest global subduction network at 2 Ga, the predominance of steep  
21 subduction zones, and the first appearance of ophiolites about 2 Ga (Abbott et al. 1994, Weller & St-  
22 Onge 2017, Condie 2018, Wan et al. 2020). The Palaeoproterozoic also saw a marked increase in the  
23 biomass in the oceans, and consequent burial of organic carbon in the crust (Martin et al. 2015,  
24 Kamennaya et al. 2018). This may have been a unique response to the c. 2.3 Ga Great Oxidation  
25 Event (GOE), or a series of regional responses to widespread igneous activity that provided increased  
26 nutrients (Martin et al. 2015). The result was prolific oxygen-tolerant cyanobacteria that left globally  
27 widespread carbon-rich sediment. An analysis of the time interval between burial of organic carbon  
28 and orogeny indicates that the developments of high biomass and plate tectonics are linked. The

1 additional carbon allowed easier deformation of the crust, in a manner that built mountain belts,  
2 and thereby plate margins characteristic of modern plate tectonics.

### 3 **Lubricating the growth of orogens: organic matter and mountain building**

4

5 The formation of plate margins, where orogens develop, is enhanced by sediment, which confers  
6 low strength. Wet sediment and metasediment increase the lubrication of subduction (Behr &  
7 Becker 2018, Sobolev & Brown 2019). Sediment containing carbonaceous matter is particularly  
8 effective in allowing deformation to occur, due to the ductile nature of organic-rich shales,  
9 overpressure weakening due to maturation of organic matter, and metamorphism to low-friction  
10 graphite (Morley et al. 2018). Sediments rich in organic matter are relatively common in collisional  
11 orogens due to the incorporation of thrust platform sequences (Morley et al. 2018).

12 Consequently, numerous studies identify organic material as a critical control on the weakening of  
13 faulted rocks in orogens (Rutter et al. 2013, Oohashi et al. 2013, Craw & Upton 2014, Lyu et al.  
14 2020). Only small amounts (few %) of carbon are required to dominate the frictional strength of the  
15 rock and allow seismic slip (Kaneki & Hirono 2019). Upon graphitization of the carbon the frictional  
16 strength is further reduced to about 0.3 times the normal stress for carbonaceous pelitic rocks  
17 (Yamasaki et al. 2016). Critically, low frictional strength enhances thrust-stacking in collisional  
18 orogens (Cooper et al. 2006), i.e. it allows crustal thickening during mountain building (Mouthereau  
19 et al. 2013).

20 Direct evidence for the deformation potential of highly carbonaceous rocks in orogens is found in an  
21 examination of major detachment surfaces in the younger, Phanerozoic record. Twenty examples of  
22 thrust detachments that supported orogenic deformation (10s to 100s km extent), aged Cambrian to  
23 Paleogene, are consistently facilitated by shales containing a few percent TOC (Supplementary Table  
24 1). The critical importance of this high level of organic carbon concentration to allow deformation is  
25 evident in a data set of Devonian shales (n=102), where shearing occurred in shales with mean TOC  
26 2.8 %, while no shearing occurred in shales with mean TOC 1.4 % (Enomoto et al. 2015). When highly  
27 carbonaceous rocks occur on a global basis, their contribution to orogenic deformation is similarly

1 widespread. Following the oceanic anoxic events of the Cretaceous, the resultant black shales  
2 became detachment surfaces in numerous orogens including in the Rockies, the Andes, Svalbard,  
3 central Europe, Indonesia and Japan (Supplementary Table 1).

4 Given the link between organic matter and deformation evident in younger rocks, the scene was set  
5 for exceptional orogenesis at ~2 Ga (Fig. 1) by the exceptional accumulation of organic carbon during  
6 the mid-Palaeoproterozoic (Figs. 1, 2). Abundant carbon is evident from a peak in black shale  
7 deposition (Condie et al. 2001), and from the record of the world's richest (highest % TOC) graphite  
8 deposits. The maximum carbon contents in carbonaceous rocks in the Palaeoproterozoic orogens  
9 are consistently above 10 %, and many are above 20 % (Table 1). These values are much greater  
10 than typical values for carbonaceous rocks in Phanerozoic orogens (Supplementary Table 1). 28 of  
11 the richest 33 graphite deposits are Palaeoproterozoic (Parnell et al. 2021; Supplementary Fig. 1,  
12 Supplementary Table 3).

13 The marine cyanobacteria that are assumed to be responsible for enhanced carbon burial  
14 underwent several important developments following the GOE. Cyanobacteria became larger after  
15 the GOE, up to 50  $\mu\text{m}$  diameter from  $<3 \mu\text{m}$  previously, and then developed sheaths (Sánchez-  
16 Baracaldo 2015), potentially increasing the mass of cellular carbon that was buried. A 10  $\mu\text{m}$   
17 diameter cell has about 25 times as much carbon as a 2.5  $\mu\text{m}$  cell (based on relationships in Mullin  
18 1966). At this range of cell sizes, larger phytoplankton cells would also settle through the water  
19 column significantly faster and thereby enhance survival of oxidation to bury more carbon (Chindia  
20 & Figueredo 2018).

21 In many cases the carbonaceous sediments were accompanied by platform limestones. The  
22 stromatolite record shows a peak at ~1.9 Ga, consistent with widespread sedimentation on broad  
23 shallow platforms (Condie et al. 2000). The passage of anomalous quantities of carbonate into  
24 subduction zones at this time is recorded by widely distributed carbonatites in Palaeoproterozoic  
25 orogens (Xu et al. 2018). The abundant marble would have further reduced friction in the  
26 Palaeoproterozoic crust (Supplementary Fig. 2). Supracrustal sediments engender thin-skinned

1 tectonics, which is characterized by high degrees of crustal shortening (Mouthereau et al. 2013). The  
2 wide distribution of supracrustal sediments deposited at ~2.0 Ga was therefore available to confer a  
3 high degree of shortening to the immediately subsequent orogens.

#### 4 **Palaeoproterozoic orogens: widespread mountain building**

5  
6 A peak in orogenesis during the Palaeoproterozoic at ~2 Ga is marked by a large number of  
7 individual orogens (Condie & Puetz 2019), the overall preserved orogen length (Condie & Puetz  
8 2019), and a high incidence of metamorphism (Brown & Johnson 2018). The first widespread  
9 formation of high mountains is inferred at this time, from a peak in the production of S-type granites  
10 from 1.95-1.65 Ga and an anomalously high peak pressure of metamorphic rocks (Zhu et al. 2020).

11 Global deformation of the Palaeoproterozoic lithosphere is shown by the response to abundant  
12 carbon in numerous individual orogens. Twenty orogens with very highly carbonaceous rocks, of  
13 Palaeoproterozoic age distributed worldwide (Fig. 1), each record deformation focussed in  
14 pelitic/graphitic metasediments, including thrusting, imbrication, isoclinal folding and shear zones  
15 that characterise crustal shortening (Table 1, Supplementary Table 2). The maximum period  
16 between sedimentation and deformation in the Palaeoproterozoic data set (measured from onset of  
17 sedimentation to end of orogeny) was mostly less than 200 Myr, notwithstanding uncertainties in  
18 dating (Fig. 3; Table 1). The period ranges from 60 to 120 Myr for five orogens in North America,  
19 where more age data is available, suggesting that this is a good guide to typical consumption times  
20 in the Palaeoproterozoic. Most subducting lithosphere today is Late Cretaceous or younger, with a  
21 mean age of about 65 Ma, and the time interval between Phanerozoic shale sedimentation and  
22 orogeny is usually less than 200 Myr and often less than 100 Myr (Supplementary Table 2). The  
23 consumption of sea floor sediment in the Palaeoproterozoic was, thus, at a similar rate to today,  
24 which has several implications. The similarity is consistent with the establishment of global  
25 subduction, and cycling of carbon via subduction zones, at ~2 Ga (Wan et al. 2020). As the carbon  
26 contents of the sediment were anomalously high in the Palaeoproterozoic, the flux of carbon into  
27 subduction zones was greater, and hence deformation could take place more readily than had been

1 possible hitherto. As inferred above, an anomalous episode of global carbon concentration on the  
2 ocean floor can support deformation by decollement in multiple orogens within 100 Myr. The  
3 availability of abundant carbon on the Palaeoproterozoic sea floor therefore created the opportunity  
4 for widespread orogeny. Less direct measurements (palaeomagnetism, palaeogeography) suggest  
5 that plate speeds have increased over the last 2 billion years (Condie et al. 2015), but the increasing  
6 database of ages implies a consistent speed of subduction.

7 The 20 examples chosen are all collisional orogens, i.e. they involved continent-continent collision,  
8 or they have a mixed accretionary and collisional history (Condie & Puetz 2019). The role played by  
9 carbonaceous rocks in contractional deformation is evident in cross-sections through  
10 Palaeoproterozoic orogenic belts, which show imbricate thrust slices detached in pelitic/graphitic  
11 sediments, often stacked near-vertically (Supplementary Fig. 3).

## 12 **The role of graphitic sediments**

13  
14 In at least fifteen of the twenty orogens in Figure 1, the deformed rocks contain graphite ore bodies.  
15 In ore grade graphite the organic carbon content is very high, enriched above the levels in unaltered  
16 carbonaceous sediments. In some cases, enrichment is a consequence of the mobilization of organic  
17 carbon during deformation and metamorphism (e.g. Kribek et al. 2015). In some other Precambrian  
18 graphite deposits, carbon is added from mantle carbon dioxide or due to the metamorphic  
19 decarbonation of marbles (Luque et al. 2014). These alternatives can be distinguished by the carbon  
20 isotopic composition of the graphite, which would be relatively light or heavy respectively (Luque et  
21 al. 2014). All of the twenty orogens have known isotopic compositions for their graphitic sediments,  
22 which are consistently light (Table 1, Supplementary Fig. 4), indicating a biological origin for the  
23 carbon in the orogens rather than from an abiotic source.

24 Evidence that the graphitic sediments localized and enhanced deformation takes two forms. Firstly,  
25 the concentration of graphite on shear surfaces is a direct consequence of carbon mobility during  
26 fault slip (Rutter et al. 2013, Oohashi et al. 2013, Craw & Upton 2014, Lyu et al. 2020). In some cases

1 there is evidence for structural thickening of the graphite due to local redistribution (e.g. in Kimban  
2 and Ketilidian orogens), and graphite is a noted component in subduction zones (e.g. in Trans-North  
3 China and Penokean orogens). Secondly, data from relatively young plate margins, including the  
4 Pacific rim (Nakamura et al. 2015), show that fault slip in graphitic rocks can cause a decrease in  
5 order in the graphite structure. This so-called strain-induced amorphization of graphite (Nakamura  
6 et al. 2015, Kaneki & Hirono 2019) is an exception to the assumed irreversibility of the graphitisation  
7 process. The anomalous disorder indicates a potential signature for graphite that facilitated  
8 deformation in the deep geological record. Graphite that had been involved in deformation could be  
9 less ordered (lower maturation and inferred palaeotemperature) than the background graphitic  
10 metasediment.

11 Spectroscopic data from graphite in several Palaeoproterozoic orogens (Kribek et al. 2015, Mirasol-  
12 Robert et al. 2017, Miranda et al. 2019, Prando et al. 2020), including the Pine Creek Orogen  
13 (Australia), Birimian Orogen (Ghana), Minas Orogen (Brazil) and Svecofennian Orogen (Finland),  
14 distinguish between a component in the country rock representing metamorphosed organic matter,  
15 and a component in fault rocks which was mobilized from the country rock (Supplementary Fig. 5).  
16 Exceptionally, the mobilized graphite in all four orogens is less ordered than the country rock, as  
17 deduced from standard measurements using Raman spectroscopy and/or X-ray diffraction,  
18 expressed as palaeotemperature-equivalents for comparison. The consistent pattern of disorder in  
19 mobilized carbon in fault rocks in the Palaeoproterozoic orogens strongly indicates that the carbon  
20 was directly involved in the Palaeoproterozoic deformation.

### 21 **The long-term legacy of the Palaeoproterozoic**

22  
23 As the consequence of carbon burial in the Palaeoproterozoic seas was the incorporation of  
24 refractory graphite during orogenesis, much carbon became locked into the geological cycle. This left  
25 a legacy for mountain building through subsequent geological history. The properties that enhanced  
26 deformation and crustal shortening during the Palaeoproterozoic are just as likely to do so where 2  
27 Ga sediments are present in much younger orogens. Accordingly, degrees of crustal shortening in

1 Phanerozoic orogens are high where they are rooted in Palaeoproterozoic crust (Mouthereau et al.  
2 2013). In the Himalayas, Palaeogene thrusting was focussed in the graphitic sediments of the ~ 2 Ga  
3 Lesser Himalaya Sequences, which had already focussed crustal shortening during the  
4 Palaeoproterozoic (Saha 2013). The intervening 2 Gyr record includes, for example, detachment on  
5 Palaeoproterozoic shale units during the 1.0 Ga Grenvillian Orogeny in Labrador (van Gool et al.  
6 2008) and the 0.43 Ga Caledonian Orogeny in Norway (Torgersen et al. 2015). Pressure-temperature  
7 (P-T) trajectories for Palaeoproterozoic granulitic metapelites (Supplementary Fig. 6) reflect  
8 reactivation involving compressional uplift and exhumation of the granulites, and show that  
9 Palaeoproterozoic pelites were reactivated during the main periods of orogenesis over the last 2  
10 billion years (Fig. 4, Supplementary Table 4). The exceptional Palaeoproterozoic biomass was  
11 reflected not only in mountain building during the Palaeoproterozoic but ever since.

12  
13  
14  
15  
16

#### **Acknowledgements**

17 The work was partially supported by NERC grant NE/M010953/1.  
18

#### **Author contributions**

19  
20  
21 Data were collated and interpreted by J.P. and C.B. Both authors have contributed to the  
22 manuscript, written by J.P.

#### **Competing interests**

23 The authors declare no competing interests  
24  
25

#### **References**

26  
27  
28 Abbott, D., Drury, R. & Smith, W.H.F. 1994. Flat to steep transition in subduction style. *Geology*, 22,  
29 937-940.  
30 Behr, W.M. & Becker, T.W. 2018. Sediment control on subduction plate speeds. *Earth and Planetary  
31 Science Letters*, 502, 166-173.

- 1 Bondesen, E., Pedersen, K.R. & Jørgensen, O. 1967. Precambrian organisms and the isotopic  
2 composition of organic remains in the Ketilidian of South-west Greenland. *Grønlands Geologiske*  
3 *Undersøgelse Bulletin*, 67, 1-41.
- 4 Brown, M. & Johnson, T. 2018. Secular change in metamorphism and the onset of global plate  
5 tectonics. *American Mineralogist*, 103, 181-196.
- 6 Chindia, J.A. & Figueredo, C.C. 2018. Phytoplankton settling depends on cell morphological traits, but  
7 what is the best predictor? *Hydrobiologia*, 813, 51-61.
- 8 Condie, K., Pisarevsky, S.A., Korenaga, J. & Gardoll, S. 2015. Is the rate of supercontinent assembly  
9 changing with time? *Precambrian Research*, 259, 278-289.
- 10 Condie, K.C. 2018. A planet in transition: The onset of plate tectonics on Earth between 3 and 2 Ga?  
11 *Geoscience Frontiers*, 9, 51-60.
- 12 Condie, K.C., Des Marais, D.J. & Abbott, D. 2000. Geologic evidence for a mantle superplume event  
13 at 1.9 Ga. *Geochemistry, Geophysics, Geosystems*, 1, GC000095.
- 14 Condie, K.C., Des Marais, D.J. & Abbott, D. 2001. Precambrian superplumes and supercontinents: a  
15 record in black shales, carbon isotopes, and paleoclimates? *Precambrian Research*, 106, 239-260.
- 16 Condie, K.C. & Puetz, S.J. 2019. Time series analysis of mantle cycles Part II: The geologic record in  
17 zircons, large igneous provinces and mantle lithosphere. *Geoscience Frontiers*, 10, 1327-1336.
- 18 Cooper, C.M., Lenardic, A., Levander, A. & Moresi, L. 2006. Creation and preservation of cratonic  
19 lithosphere: seismic constraints and geodynamic models. *Geophysical Monograph Series, Archean*  
20 *Geodynamics and Environments*, 164, 75-88.
- 21 Craw, D. & Upton, P. 2014. Graphite reaction weakening of fault rocks, and uplift of the Annapurna  
22 Himal, central Nepal, *Geosphere*, 10, 720-731.
- 23 Enomoto, C.B., Coleman, J.L., Swezey, C.S., Niemeyer, P.W. & Dulong, F.T. 2015. Geochemical and  
24 mineralogical sampling of the Devonian shales in the Broadtop Synclinorium, Appalachian Basin, in



1 Virginia, West Virginia, Maryland, and Pennsylvania. United States Geological Survey Open-File  
2 Report 2015-1061.

3 Harley, S.L. 1989. The origins of granulites: a metamorphic perspective. *Geological Magazine*, 126,  
4 215-247.

5 Kamennaya, N.A., Zemla, M., Mahoney, L., Chen, L., Holman, E., Holman, H-Y., Auer, M., Ajo-Franklin,  
6 C.M. & Jansson, C. 2018. High pCO<sub>2</sub>-induced exopolysaccharide-rich ballasted aggregates of  
7 planktonic cyanobacteria could explain Paleoproterozoic carbon burial. *Nature Communications*, 9,  
8 2116.

10 Kaneki, S. & Hirono, T. 2019. Diagenetic and shear-induced transitions of frictional strength of  
11 carbon-bearing faults and their implications for earthquake rupture dynamics in subduction zones.  
12 *Scientific Reports*, 9, doi.org/10.1038/s41598-019-44307-y.

13 Kirilova, M., Toy, V., Rooney, J.S., Giorgetti, C., Gordon, K.C., Collettini, C. & Takeshita, T. 2018.  
14 Structural disorder of graphite and implications for graphite thermometry. *Solid Earth*, 9, 223-231.

15 Luque, F.J., Huizenga, J-M., Crespo-Feo, E., Wada, H., Ortega, L. & Barrenechea, J.F. 2014. Vein  
16 graphite deposits: geological settings, origin, and economic significance. *Mineralium Deposita*, 49,  
17 261–277.

18 Lyu, M., Cao, S., Neubauer, F., Li, J. & Cheng, X. 2020. Deformation fabrics and strain localization  
19 mechanisms in graphitic carbon-bearing rocks from the Ailaoshan-Red River strike-slip fault zone.  
20 *Journal of Structural Geology*, 140, 104150.

21 Martin, A.P., Prave, A.R., Condon, D.J., Lepland, A., Fallick, A.E., Romashkin, A.E., Medvedev, P.V. &  
22 Rychanchik, D.V. 2015. Multiple Palaeoproterozoic carbon burial episodes and excursions. *Earth and  
23 Planetary Science Letters*, 424, 226-236.

24 Miranda, D.A., Chaves, A. de O., Campello, M.S. & Ramos, S.L.L. de M. 2019. Origin and thermometry  
25 of graphites from Itapeceerica supracrustal succession of the southern Sao Francisco Craton by C

1 isotopes, X-ray diffraction, and Raman spectroscopy. *International Geology Review*, 61, 1864-1875.

2 Mirasol-Robert, A., Grotheer, H., Bourdet, J., Suvorova, A., Grice, K., McCuaig, T.C. & Greenwood,  
3  
4 P.F. 2017. Evidence and origin of different types of sedimentary organic matter from a  
5 Paleoproterozoic orogenic Au deposit. *Precambrian Research*, 299, 319-338.

6 Morley, C.K., von Hagke, C., Hansberry, R., Collins, A., Kanitpanyacharoen, W. & King, R. 2018.  
7 Review of major shale-dominated detachment and thrust characteristics in the diagenetic zone: Part  
8 II, rock mechanics and microscopic scale. *Earth-Science Reviews*, 176, 19-50.

9 Mouthereau, F., Watts, A.B. & Burov, E. 2013. Structure of orogenic belts controlled by lithospheric  
10 age. *Nature Geoscience*, 6, 785-789.

11 Mullin, M.M., Sloan, P.R. & Eppley, R.W. 1966. Relationship between carbon content, cell volume,  
12 and area in phytoplankton. *Limnology and Oceanography*, 11, 307-311.

13 Nakamura, Y., Oohashi, K., Toyoshima, T., Satish-Kumar, M. & Akai, J., 2015. Strain-induced  
14 amorphization of graphite in fault zones of the Hidaka metamorphic belt, Hokkaido, Japan. *Journal*  
15 *of Structural Geology*, 72, 142-161.

16 Oohashi, K., Hirose, T. & Shimamoto, T. 2013. Graphite as a lubricating agent in fault zones: An  
17 insight from low- to high-velocity friction experiments on a mixed graphite-quartz gouge. *Journal of*  
18 *Geophysical Research*, 118, 2067-2084.

19 Parnell, J., Brolly, C. & Boyce, A.J. 2021. Graphite from Palaeoproterozoic enhanced carbon burial,  
20 and its metallogenic legacy. *Geological Magazine*, in press.

21 Plank, M.O. & Schenck, W.S. 1998. Delaware Piedmont Geology. Delaware Geological Survey Special  
22 Publication No. 20.

23 Prando, F., Menegon, L., Anderson, M., Marchesini, B., Mattila, J. & Viola, G. 2020. Fluid-mediated  
24 brittle-ductile deformation at seismogenic depth – Part 2: Stress history and fluid pressure variations  
25 in a shear zone in a nuclear waste repository (Olkiluoto Island, Finland). *Solid Earth*, 11, 489-511.

1 Rutter, E.H., Hackston, A.J., Yeatman, E., Brodie, K.H., Mecklenburgh, J. & May, S.E. 2013. Reduction  
2 of friction on geological faults by weak-phase smearing. *Journal of Structural Geology*, 51, 52-60.

3 Saha, D. 2013. Lesser Himalayan sequences in Eastern Himalaya and their deformation: Implications  
4 for Paleoproterozoic tectonic activity along the northern margin of India. *Geoscience Frontiers*, 4,  
5 289-304.

6 Sánchez-Baracaldo, P. 2015. Origin of marine planktonic cyanobacteria. *Scientific Reports*, 5:17418.  
7 DOI: 10.1038/srep17418.

8 Sobolev, S.V. & Brown, M. 2019. Surface erosion events controlled the evolution of plate tectonics  
9 on Earth. *Nature*, 570, 52-57.

10 Torgersen, E., Viola, G. & Sandstad, J.S. 2015. Revised structure and stratigraphy of the northwestern  
11 Repparfjord Tectonic Window, northern Norway. *Norwegian Journal of Geology*, 95, 397-421.

12 Van Gool, J.A.M., Rivers, T. & Calon, T. 2008. Grenville Front Zone, Gagnon terrane, southwestern  
13 Labrador: Configuration of a midcrustal foreland fold-thrust belt. *Tectonics*, 27, TC1004,  
14 doi:10.1029/2006TC002095.

15 Wan, B., Yang, X., Tian, X., Yuan, H., Kirscher, U & Mitchell, R.N. 2020. Seismological evidence for the  
16 earliest global subduction network at 2 Ga ago. *Sciences Advances*, 6, eabc 5491.

17 Weller, O.M. & St-Onge, M.R. 2017. Record of modern-style plate tectonics in the Palaeoproterozoic  
18 Trans-Hudson orogen. *Nature Geoscience*, 10, 305-311.

19 Xu, C., Kynický, J., Song, W., Tao, R., Lü, Z., Li, Y., Yang, Y., Pohanka, M., Galiova, M.V., Zhang, L. & Fei,  
20  
21 Y. 2018. Cold deep subduction recorded by remnants of a Paleoproterozoic carbonated slab. *Nature*  
22 *Communications*, 9, doi:10.1038/s41467-018-05140-5

23 Yamasaki, S., Chigira, M. & Petley, D.N. 2016. The role of graphite layers in gravitational deformation  
24 of pelitic schist. *Engineering Geology*, 208, 29-38.

25 Zhu, Z., Campbell, I.H., Allen, C.M. & Burnham, A.D. 2020. S-type granites: Their origin and

1 distribution through time as determined from detrital zircons. Earth and Planetary Sciences, 536,  
2 116140.

3  
4  
5  
6 **Figure 1. Palaeoproterozoic orogens, distributed globally, exhibiting significant deformation within**  
7 **highly carbonaceous rocks.** Orogenies all commenced 2.1 to 1.8 Ga. Details in Table 1.

8 **Figure 2. Occurrence of carbonaceous sediment and orogeny through time.** Sediments recorded by  
9 graphite deposits weighted by mean carbon content (authors unpublished data), abundance of black  
10 shales (Condie et al. 2001), and stromatolite occurrences as a measure of carbonate platform  
11 abundance (Condie et al. 2000). Orogeny recorded by incidence of metamorphism (Brown &  
12 Johnson 2018), abundance of orogens dated by onset of deformation (Condie & Puetz 2019), and  
13 preserved length of orogens (Condie & Puetz 2019). Peak occurrence in sediment input coincides  
14 with peak in orogenic activity.

15 **Figure 3. Chronology of carbonaceous sediments and deformation in 20 Palaeoproterozoic**  
16 **orogens.** Details in Table 1. Maximum interval between carbonaceous rocks and deformation is  
17 consistently <200 Myr, comparable to Phanerozoic orogens.

18 **Figure 4. Reactivation of Palaeoproterozoic pelites during younger orogenies.** Pelites deformed  
19 during subduction-related collision in the Palaeoproterozoic were deformed further during younger  
20 continental collision, particularly during episodes of widespread orogenesis (measured by Condie &  
21 Puetz 2019). Details of orogenies in Supplementary Table 4.

## **Elevated biomass at 2 Ga triggered mountain building**

**J. Parnell\*, C. Brolly**

**School of Geosciences, University of Aberdeen, Aberdeen AB24 3UE, United Kingdom**

**\*J.Parnell@abdn.ac.uk**

The geological record following the c. 2.3 Ga Great Oxidation Event includes evidence for an anomalously high burial of organic carbon, and the emergence of modern plate tectonics. Both occurred globally over the period 2.1 to 1.8 Ga. In numerous orogens, highly carbonaceous sediments focussed deformation by thrusting, folding and shearing. Here an assessment of the timing of Palaeoproterozoic carbon burial and peak deformation/metamorphism shows that orogeny consistently occurred less than 200 Myr after sedimentation, in a time frame comparable to that of orogens through the Phanerozoic. This implies that the high carbon burial played a key role in lubricating compressive deformation, and it allowed the crustal thickening that built Palaeoproterozoic mountain belts. Further, this episode left a legacy of weakening and deformation in 2 Gyr-old crust, which has supported orogeny up to the building of the Himalayas today.

Orogeny involves the building of continental mountains by plate tectonic processes in which the lithosphere is deformed under compression. Several lines of evidence mark the Palaeoproterozoic as the time when plate tectonics, and mountain building, commenced in the form which has continued to the present day. This is evident in a rapid increase in the frequency of collisional orogens, an increase in the production of continental crust as recorded by zircon ages, the earliest large lateral plate motions, the earliest global subduction network at 2 Ga, the predominance of steep subduction zones, and the first appearance of ophiolites about 2 Ga (Abbott et al. 1994, Weller & St-Onge 2017, Condie 2018, Wan et al. 2020). The Palaeoproterozoic also saw a marked increase in the biomass in the oceans, and consequent burial of organic carbon in the crust (Martin et al. 2015, Kamennaya et al. 2018). This may have been a unique response to the c. 2.3 Ga Great Oxidation Event (GOE), or a series of regional responses to widespread igneous activity that provided increased nutrients (Martin et al. 2015). The result was prolific oxygen-tolerant cyanobacteria that left globally widespread carbon-rich sediment. An analysis of the time interval between burial of organic carbon

and orogeny indicates that the developments of high biomass and plate tectonics are linked. The additional carbon allowed easier deformation of the crust, in a manner that built mountain belts, and thereby plate margins characteristic of modern plate tectonics.

### **Lubricating the growth of orogens: organic matter and mountain building**

The formation of plate margins, where orogens develop, is enhanced by sediment, which confers low strength. Wet sediment and metasediment increase the lubrication of subduction (Behr & Becker 2018, Sobolev & Brown 2019). Sediment containing carbonaceous matter is particularly effective in allowing deformation to occur, due to the ductile nature of organic-rich shales, overpressure weakening due to maturation of organic matter, and metamorphism to low-friction graphite (Morley et al. 2018). Sediments rich in organic matter are relatively common in collisional orogens due to the incorporation of thrust platform sequences (Morley et al. 2018).

Consequently, numerous studies identify organic material as a critical control on the weakening of faulted rocks in orogens (Rutter et al. 2013, Ohashi et al. 2013, Craw & Upton 2014, Lyu et al. 2020). Only small amounts (few %) of carbon are required to dominate the frictional strength of the rock and allow seismic slip (Kaneki & Hirano 2019). Upon graphitization of the carbon, the frictional strength is further reduced to about 0.3 times the normal stress for carbonaceous pelitic rocks (Yamasaki et al. 2016). Critically, low frictional strength enhances thrust-stacking in collisional orogens (Cooper et al. 2006), i.e. it allows crustal thickening during mountain building (Mouthereau et al. 2013).

Direct evidence for the deformation potential of highly carbonaceous rocks in orogens is found in an examination of major detachment surfaces in the younger, Phanerozoic record. Twenty examples of thrust detachments that supported orogenic deformation (10s to 100s km extent), aged Cambrian to Paleogene, are consistently facilitated by shales containing a few percent TOC (Supplementary Table 1). The critical importance of this high level of organic carbon concentration to allow deformation is evident in a data set of Devonian shales (n=102), where shearing occurred in shales with mean TOC

2.8 %, while no shearing occurred in shales with mean TOC 1.4 % (Enomoto et al. 2015). When highly carbonaceous rocks occur on a global basis, their contribution to orogenic deformation is similarly widespread. Following the oceanic anoxic events of the Cretaceous, the resultant black shales became detachment surfaces in numerous orogens including in the Rockies, the Andes, Svalbard, central Europe, Indonesia and Japan (Supplementary Table 1).

Given the link between organic matter and deformation evident in younger rocks, the scene was set for exceptional orogenesis at ~2 Ga (Fig. 1) by the exceptional accumulation of organic carbon during the mid-Palaeoproterozoic (Figs. 1, 2). Abundant carbon is evident from a peak in black shale deposition (Condie et al. 2001), and from the record of the world's richest (highest % TOC) graphite deposits. The maximum carbon contents in carbonaceous rocks in the Palaeoproterozoic orogens are consistently above 10 %, and many are above 20 % (Table 1). These values are much greater than typical values for carbonaceous rocks in Phanerozoic orogens (Supplementary Table 1). 28 of the richest 33 graphite deposits are Palaeoproterozoic (Parnell et al. 2021; Supplementary Fig. 1, Supplementary Table 3).

The marine cyanobacteria that are assumed to be responsible for enhanced carbon burial underwent several important developments following the GOE. Cyanobacteria became larger after the GOE, up to 50 µm diameter from <3 µm previously, and then developed sheaths (Sánchez-Baracaldo 2015), potentially increasing the mass of cellular carbon that was buried. A 10 µm diameter cell has about 25 times as much carbon as a 2.5 µm cell (based on relationships in Mullin 1966). At this range of cell sizes, larger phytoplankton cells would also settle through the water column significantly faster and thereby enhance survival of oxidation to bury more carbon (Chindia & Figueredo 2018).

In many cases, the carbonaceous sediments were accompanied by platform limestones. The stromatolite record shows a peak at ~1.9 Ga, consistent with widespread sedimentation on broad shallow platforms (Condie et al. 2000). The passage of anomalous quantities of carbonate into



subduction zones at this time is recorded by widely distributed carbonatites in Palaeoproterozoic orogens (Xu et al. 2018). The abundant marble would have further reduced friction in the Palaeoproterozoic crust (Supplementary Fig. 2). Supracrustal sediments engender thin-skinned tectonics, which is characterized by high degrees of crustal shortening (Mouthereau et al. 2013). The wide distribution of supracrustal sediments deposited at ~2.0 Ga was therefore available to confer a high degree of shortening to the immediately subsequent orogens.

### **Palaeoproterozoic orogens: widespread mountain building**

A peak in orogenesis during the Palaeoproterozoic at ~2 Ga is marked by a large number of individual orogens (Condie & Puetz 2019), the overall preserved orogen length (Condie & Puetz 2019), and a high incidence of metamorphism (Brown & Johnson 2018). The first widespread formation of high mountains is inferred at this time, from a peak in the production of S-type granites from 1.95-1.65 Ga and an anomalously high peak pressure of metamorphic rocks (Zhu et al. 2020). Global deformation of the Palaeoproterozoic lithosphere is shown by the response to abundant carbon in numerous individual orogens. Twenty orogens with very highly carbonaceous rocks, of Palaeoproterozoic age distributed worldwide (Fig. 1), each record deformation focussed in pelitic/graphitic metasediments, including thrusting, imbrication, isoclinal folding and shear zones that characterise crustal shortening (Table 1, Supplementary Table 2). The maximum period between sedimentation and deformation in the Palaeoproterozoic data set (measured from onset of sedimentation to end of orogeny) was mostly less than 200 Myr, notwithstanding uncertainties in dating (Fig. 3; Table 1). The period ranges from 60 to 120 Myr for five orogens in North America, where more age data is available, suggesting that this is a good guide to typical **consumption** times in the Palaeoproterozoic. Most subducting lithosphere today is Late Cretaceous or younger, with a mean age of about **65 Ma**, and the time interval between Phanerozoic shale sedimentation and orogeny is usually less than 200 Myr and often less than 100 Myr (Supplementary Table 2). The consumption of sea floor sediment in the Palaeoproterozoic was, thus, at a similar rate to today,

which has several implications. The similarity is consistent with the establishment of global subduction, and cycling of carbon via subduction zones, at ~2 Ga (Wan et al. 2020). As the carbon contents of the sediment were anomalously high in the Palaeoproterozoic, the flux of carbon into subduction zones was greater, and hence deformation could take place more readily than had been possible hitherto. As inferred above, an anomalous episode of global carbon concentration on the ocean floor can support deformation by decollement in multiple orogens within 100 Myr. The availability of abundant carbon on the Palaeoproterozoic sea floor therefore created the opportunity for widespread orogeny. **Less direct measurements (palaeomagnetism, palaeogeography) suggest that plate speeds have increased over the last 2 billion years (Condie et al. 2015), but the increasing database of ages implies a consistent speed of subduction.**

The 20 examples chosen are all collisional orogens, i.e. ~~they involved~~ continent-continent collision, or they have a mixed accretionary and collisional history (Condie & Puetz 2019). The role played by carbonaceous rocks in contractional deformation is evident in cross-sections through Palaeoproterozoic orogenic belts, which show imbricate thrust slices detached in pelitic/graphitic sediments, often stacked near-vertically **(Supplementary Fig. 3)**.

### **The role of graphitic sediments**

In at least fifteen of the twenty orogens in Figure 1, the deformed rocks contain graphite ore bodies. In ~~ore-grade graphite~~ the organic carbon content is very high, enriched above the levels in unaltered carbonaceous sediments. In some cases, enrichment is a consequence of the mobilization of organic carbon during deformation and metamorphism (e.g. Kribek et al. 2015). In some other Precambrian graphite deposits, carbon is added from mantle carbon dioxide or due to the metamorphic decarbonation of marbles (Luque et al. 2014). These alternatives can be distinguished by the carbon isotopic composition of the graphite, which would be relatively light or heavy ~~respectively~~ (Luque et al. 2014). All of the twenty orogens have known isotopic compositions for their graphitic sediments,

which are consistently light (Table 1, Supplementary Fig. 4), indicating a biological origin for the carbon in the orogens rather than from an abiotic source.

Evidence that the graphitic sediments localized and enhanced deformation takes two forms. Firstly, the concentration of graphite on shear surfaces is a direct consequence of carbon mobility during fault slip (Rutter et al. 2013, Oohashi et al. 2013, Craw & Upton 2014, Lyu et al. 2020). In some cases there is evidence for structural thickening of the graphite due to local redistribution (e.g. in Kimban and Ketilidian orogens), and graphite is a noted component in subduction zones (e.g. in Trans-North China and Penokean orogens). Secondly, data from relatively young plate margins, including the Pacific rim (Nakamura et al. 2015), show that fault slip in graphitic rocks can cause a decrease in order in the graphite structure. This so-called strain-induced amorphization of graphite (Nakamura et al. 2015, Kaneki & Hirono 2019) is an exception to the assumed irreversibility of the graphitisation process. The anomalous disorder indicates a potential signature for graphite that facilitated deformation in the deep geological record. Graphite that had been involved in deformation could be less ordered (lower maturation and inferred palaeotemperature) than the background graphitic metasediment.

Spectroscopic data from graphite in several Palaeoproterozoic orogens (Kribek et al. 2015, Mirasol-Robert et al. 2017, Miranda et al. 2019, Prando et al. 2020), including the Pine Creek Orogen (Australia), Birimian Orogen (Ghana), Minas Orogen (Brazil) and Svecofennian Orogen (Finland), distinguish between a component in the country rock representing metamorphosed organic matter, and a component in fault rocks which was mobilized from the country rock (Supplementary Fig. 5). Exceptionally, the mobilized graphite in all four orogens is less ordered than the country rock, as deduced from standard measurements using Raman spectroscopy and/or X-ray diffraction, expressed as palaeotemperature-equivalents for comparison. The consistent pattern of disorder in mobilized carbon in fault rocks in the Palaeoproterozoic orogens strongly indicates that the carbon was directly involved in the Palaeoproterozoic deformation.

## **The long-term legacy of the Palaeoproterozoic**

As the consequence of carbon burial in the Palaeoproterozoic seas was the incorporation of refractory graphite during orogenesis, much carbon became locked into the geological cycle. This left a legacy for mountain building through subsequent geological history. The properties that enhanced deformation and crustal shortening during the Palaeoproterozoic are just as likely to do so where 2 Ga sediments are present in much younger orogens. Accordingly, degrees of crustal shortening in Phanerozoic orogens are high where they are rooted in Palaeoproterozoic crust (Mouthereau et al. 2013). In the Himalayas, Palaeogene thrusting was focussed in the graphitic sediments of the ~ 2 Ga Lesser Himalaya Sequences, which had already focussed crustal shortening during the Palaeoproterozoic (Saha 2013). The intervening 2 Gyr record includes, for example, detachment on Palaeoproterozoic shale units during the 1.0 Ga Grenvillian Orogeny in Labrador (van Gool et al. 2008) and the 0.43 Ga Caledonian Orogeny in Norway (Torgersen et al. 2015). Pressure-temperature (P-T) trajectories for Palaeoproterozoic granulitic metapelites (Supplementary Fig. 6) reflect reactivation involving compressional uplift and exhumation of the granulites, and show that Palaeoproterozoic pelites were reactivated during the main periods of orogenesis over the last 2 billion years (Fig. 4, Supplementary Table 4). The exceptional Palaeoproterozoic biomass was reflected not only in mountain building during the Palaeoproterozoic but ever since.

## **Acknowledgements**

The work was partially supported by NERC grant NE/M010953/1.

## **Author contributions**

Data were collated and interpreted by J.P. and C.B. Both authors have contributed to the manuscript, written by J.P.

## **Competing interests**

The authors declare no competing interests

## References

- Abbott, D., Drury, R. & Smith, W.H.F. 1994. Flat to steep transition in subduction style. *Geology*, 22, 937-940.
- Behr, W.M. & Becker, T.W. 2018. Sediment control on subduction plate speeds. *Earth and Planetary Science Letters*, 502, 166-173.
- Bondesen, E., Pedersen, K.R. & Jørgensen, O. 1967. Precambrian organisms and the isotopic composition of organic remains in the Ketilidian of South-west Greenland. *Grønlands Geologiske Undersøgelse Bulletin*, 67, 1-41.
- Brown, M. & Johnson, T. 2018. Secular change in metamorphism and the onset of global plate tectonics. *American Mineralogist*, 103, 181-196.
- Chindia, J.A. & Figueredo, C.C. 2018. Phytoplankton settling depends on cell morphological traits, but what is the best predictor? *Hydrobiologia*, 813, 51-61.
- Condie, K., Pisarevsky, S.A., Korenaga, J. & Gardoll, S. 2015. Is the rate of supercontinent assembly changing with time? *Precambrian Research*, 259, 278-289.
- Condie, K.C. 2018. A planet in transition: The onset of plate tectonics on Earth between 3 and 2 Ga? *Geoscience Frontiers*, 9, 51-60.
- Condie, K.C., Des Marais, D.J. & Abbott, D. 2000. Geologic evidence for a mantle superplume event at 1.9 Ga. *Geochemistry, Geophysics, Geosystems*, 1, GC000095.
- Condie, K.C., Des Marais, D.J. & Abbott, D. 2001. Precambrian superplumes and supercontinents: a record in black shales, carbon isotopes, and paleoclimates? *Precambrian Research*, 106, 239-260.
- Condie, K.C. & Puetz, S.J. 2019. Time series analysis of mantle cycles Part II: The geologic record in zircons, large igneous provinces and mantle lithosphere. *Geoscience Frontiers*, 10, 1327-1336.

Cooper, C.M., Lenardic, A., Levander, A. & Moresi, L. 2006. Creation and preservation of cratonic lithosphere: seismic constraints and geodynamic models. *Geophysical Monograph Series, Archean Geodynamics and Environments*, 164, 75-88.

Craw, D. & Upton, P. 2014. Graphite reaction weakening of fault rocks, and uplift of the Annapurna Himal, central Nepal, *Geosphere*, 10, 720-731.

Enomoto, C.B., Coleman, J.L., Swezey, C.S., Niemeyer, P.W. & Dulong, F.T. 2015. Geochemical and mineralogical sampling of the Devonian shales in the Broadtop Synclinorium, Appalachian Basin, in Virginia, West Virginia, Maryland, and Pennsylvania. United States Geological Survey Open-File Report 2015-1061.

Harley, S.L. 1989. The origins of granulites: a metamorphic perspective. *Geological Magazine*, 126, 215-247.

Kamennaya, N.A., Zemla, M., Mahoney, L., Chen, L., Holman, E., Holman, H-Y., Auer, M., Ajo-Franklin, C.M. & Jansson, C. 2018. High pCO<sub>2</sub>-induced exopolysaccharide-rich ballasted aggregates of planktonic cyanobacteria could explain Paleoproterozoic carbon burial. *Nature Communications*, 9, 2116.

Kaneki, S. & Hirono, T. 2019. Diagenetic and shear-induced transitions of frictional strength of carbon-bearing faults and their implications for earthquake rupture dynamics in subduction zones. *Scientific Reports*, 9, doi.org/10.1038/s41598-019-44307-y.

Kirilova, M., Toy, V., Rooney, J.S., Giorgetti, C., Gordon, K.C., Collettini, C. & Takeshita, T. 2018. Structural disorder of graphite and implications for graphite thermometry. *Solid Earth*, 9, 223-231.

Luque, F.J., Huizenga, J-M., Crespo-Feo, E., Wada, H., Ortega, L. & Barrenechea, J.F. 2014. Vein graphite deposits: geological settings, origin, and economic significance. *Mineralium Deposita*, 49, 261–277.

- Lyu, M., Cao, S., Neubauer, F., Li, J. & Cheng, X. 2020. Deformation fabrics and strain localization mechanisms in graphitic carbon-bearing rocks from the Ailaoshan-Red River strike-slip fault zone. *Journal of Structural Geology*, 140, 104150.
- Martin, A.P., Prave, A.R., Condon, D.J., Lepland, A., Fallick, A.E., Romashkin, A.E., Medvedev, P.V. & Rychanchik, D.V. 2015. Multiple Palaeoproterozoic carbon burial episodes and excursions. *Earth and Planetary Science Letters*, 424, 226-236.
- Miranda, D.A., Chaves, A. de O., Campello, M.S. & Ramos, S.L.L. de M. 2019. Origin and thermometry of graphites from Itapeçerica supracrustal succession of the southern Sao Francisco Craton by C isotopes, X-ray diffraction, and Raman spectroscopy. *International Geology Review*, 61, 1864-1875.
- Mirasol-Robert, A., Grotheer, H., Bourdet, J., Suvorova, A., Grice, K., McCuaig, T.C. & Greenwood, P.F. 2017. Evidence and origin of different types of sedimentary organic matter from a Paleoproterozoic orogenic Au deposit. *Precambrian Research*, 299, 319-338.
- Morley, C.K., von Hagke, C., Hansberry, R., Collins, A., Kanitpanyacharoen, W. & King, R. 2018. Review of major shale-dominated detachment and thrust characteristics in the diagenetic zone: Part II, rock mechanics and microscopic scale. *Earth-Science Reviews*, 176, 19-50.
- Mouthereau, F., Watts, A.B. & Burov, E. 2013. Structure of orogenic belts controlled by lithospheric age. *Nature Geoscience*, 6, 785-789.
- Mullin, M.M., Sloan, P.R. & Eppley, R.W. 1966. Relationship between carbon content, cell volume, and area in phytoplankton. *Limnology and Oceanography*, 11, 307-311.
- Nakamura, Y., Oohashi, K., Toyoshima, T., Satish-Kumar, M. & Akai, J., 2015. Strain-induced amorphization of graphite in fault zones of the Hidaka metamorphic belt, Hokkaido, Japan. *Journal of Structural Geology*, 72, 142-161.

Oohashi, K., Hirose, T. & Shimamoto, T. 2013. Graphite as a lubricating agent in fault zones: An insight from low- to high-velocity friction experiments on a mixed graphite-quartz gouge. *Journal of Geophysical Research*, 118, 2067-2084.

Parnell, J., Brolly, C. & Boyce, A.J. 2021. Graphite from Palaeoproterozoic enhanced carbon burial, and its metallogenic legacy. *Geological Magazine*, in press.

Plank, M.O. & Schenck, W.S. 1998. Delaware Piedmont Geology. Delaware Geological Survey Special Publication No. 20.

Prando, F., Menegon, L., Anderson, M., Marchesini, B., Mattila, J. & Viola, G. 2020. Fluid-mediated brittle-ductile deformation at seismogenic depth – Part 2: Stress history and fluid pressure variations in a shear zone in a nuclear waste repository (Olkiluoto Island, Finland). *Solid Earth*, 11, 489-511.

Rutter, E.H., Hackston, A.J., Yeatman, E., Brodie, K.H., Mecklenburgh, J. & May, S.E. 2013. Reduction of friction on geological faults by weak-phase smearing. *Journal of Structural Geology*, 51, 52-60.

Saha, D. 2013. Lesser Himalayan sequences in Eastern Himalaya and their deformation: Implications for Paleoproterozoic tectonic activity along the northern margin of India. *Geoscience Frontiers*, 4, 289-304.

Sánchez-Baracaldo, P. 2015. Origin of marine planktonic cyanobacteria. *Scientific Reports*, 5:17418. DOI: 10.1038/srep17418.

Sobolev, S.V. & Brown, M. 2019. Surface erosion events controlled the evolution of plate tectonics on Earth. *Nature*, 570, 52-57.

Torgersen, E., Viola, G. & Sandstad, J.S. 2015. Revised structure and stratigraphy of the northwestern Repparfjord Tectonic Window, northern Norway. *Norwegian Journal of Geology*, 95, 397-421.



Van Gool, J.A.M., Rivers, T. & Calon, T. 2008. Grenville Front Zone, Gagnon terrane, southwestern Labrador: Configuration of a midcrustal foreland fold-thrust belt. *Tectonics*, 27, TC1004, doi:10.1029/2006TC002095.

Wan, B., Yang, X., Tian, X., Yuan, H., Kirscher, U & Mitchell, R.N. 2020. Seismological evidence for the earliest global subduction network at 2 Ga ago. *Sciences Advances*, 6, eabc 5491.

Weller, O.M. & St-Onge, M.R. 2017. Record of modern-style plate tectonics in the Palaeoproterozoic Trans-Hudson orogen. *Nature Geoscience*, 10, 305-311.

Xu, C., Kynický, J., Song, W., Tao, R., Lü, Z., Li, Y., Yang, Y., Pohanka, M., Galiova, M.V., Zhang, L. & Fei, Y. 2018. Cold deep subduction recorded by remnants of a Paleoproterozoic carbonated slab. *Nature Communications*, 9, doi:10.1038/s41467-018-05140-5

Yamasaki, S., Chigira, M. & Petley, D.N. 2016. The role of graphite layers in gravitational deformation of pelitic schist. *Engineering Geology*, 208, 29-38.

Zhu, Z., Campbell, I.H., Allen, C.M. & Burnham, A.D. 2020. S-type granites: Their origin and distribution through time as determined from detrital zircons. *Earth and Planetary Sciences*, 536, 116140.

Figure 1. **Palaeoproterozoic orogens, distributed globally, exhibiting significant deformation within highly carbonaceous rocks.** Orogenies all commenced 2.1 to 1.8 Ga. Details in Table 1.

Figure 2. **Occurrence of carbonaceous sediment and orogeny through time.** Sediments recorded by graphite deposits weighted by mean carbon content (authors unpublished data), abundance of black shales (Condie et al. 2001), and stromatolite occurrences as a measure of carbonate platform abundance (Condie et al. 2000). Orogeny recorded by incidence of metamorphism (Brown & Johnson 2018), abundance of orogens dated by onset of deformation (Condie & Puetz 2019), and

preserved length of orogens (Condie & Puetz 2019). Peak occurrence in sediment input coincides with peak in orogenic activity.

Figure 3. **Chronology of carbonaceous sediments and deformation in 20 Palaeoproterozoic orogens.** Details in Table 1. Maximum interval between carbonaceous rocks and deformation is consistently <200 Myr, comparable to Phanerozoic orogens.

Figure 4. **Reactivation of Palaeoproterozoic pelites during younger orogenies.** Pelites deformed during subduction-related collision in the Palaeoproterozoic were deformed further during younger continental collision, particularly during episodes of widespread orogenesis (measured by Condie & Puetz 2019). Details of orogenies in Supplementary Table 4.

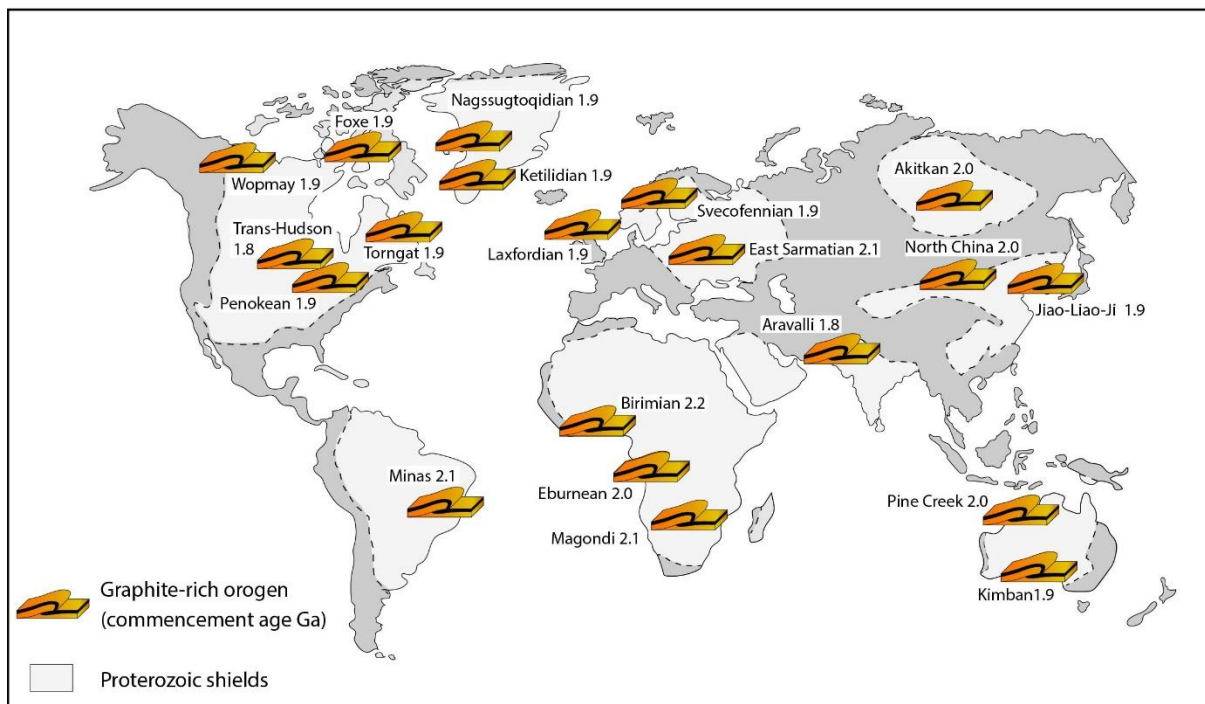

Fig. 1

### Sediment input

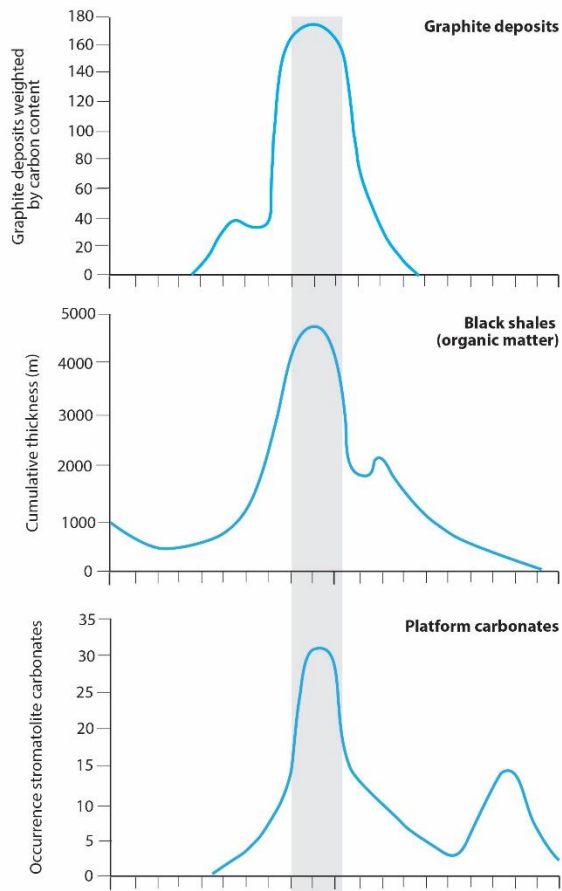

### Orogen intensity

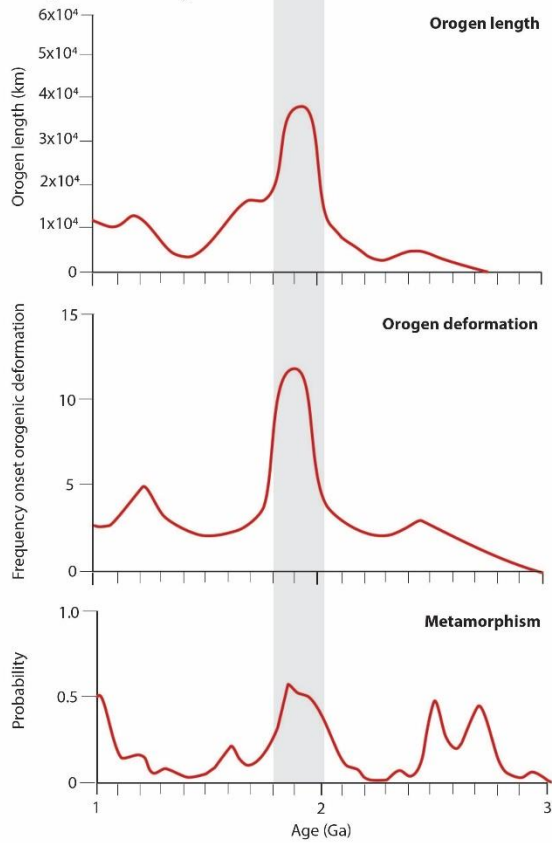

Fig. 2

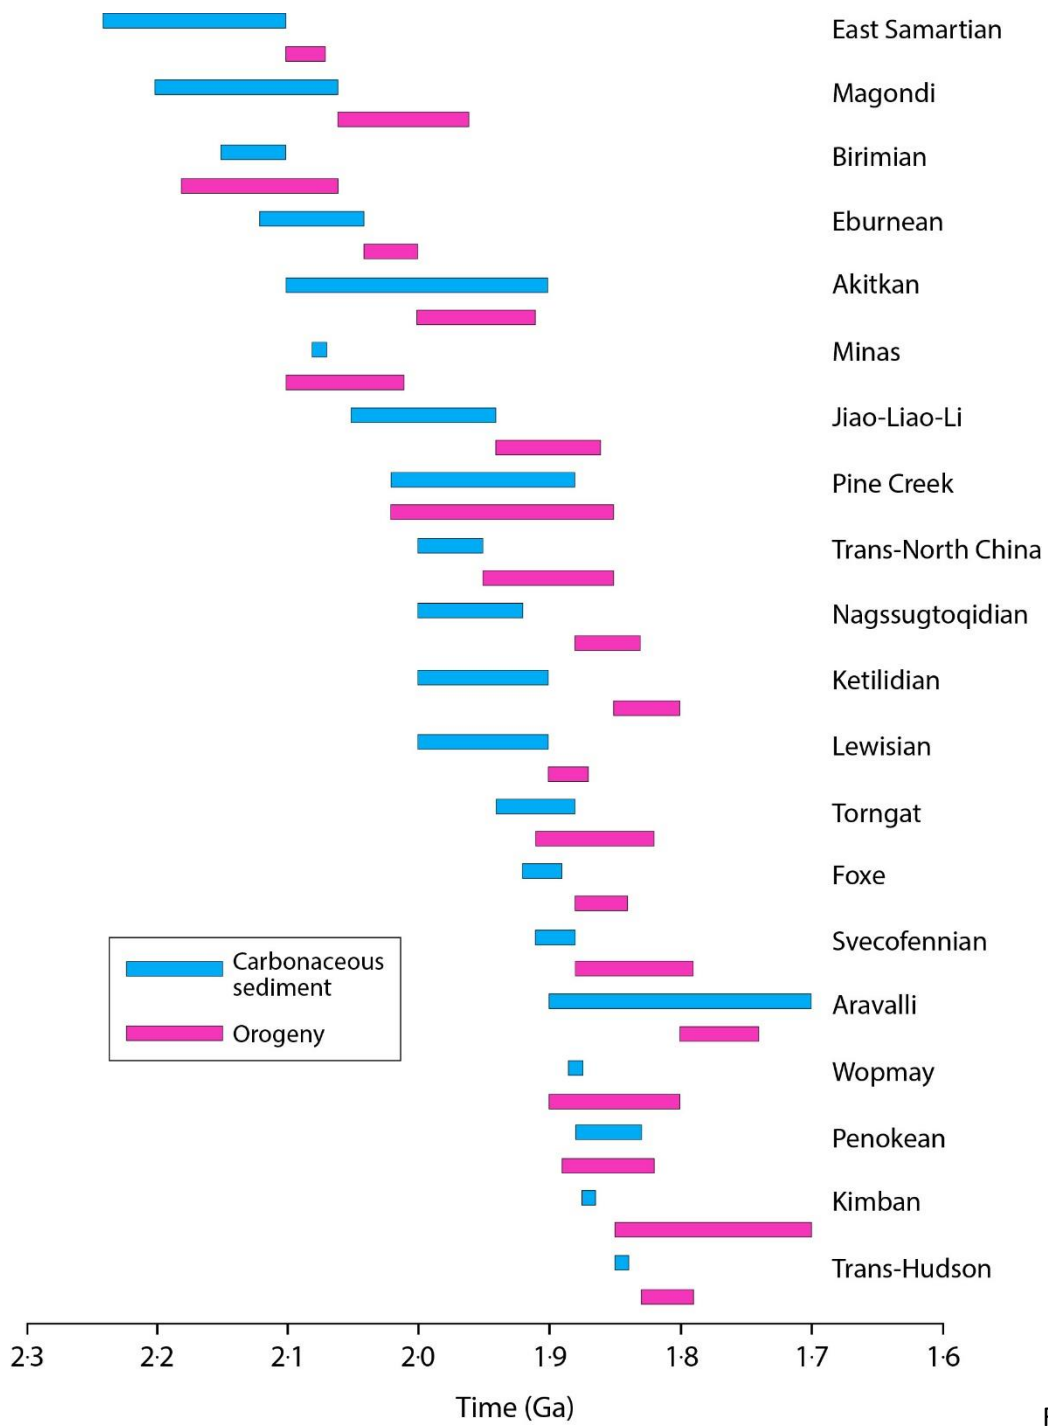

Fig. 3

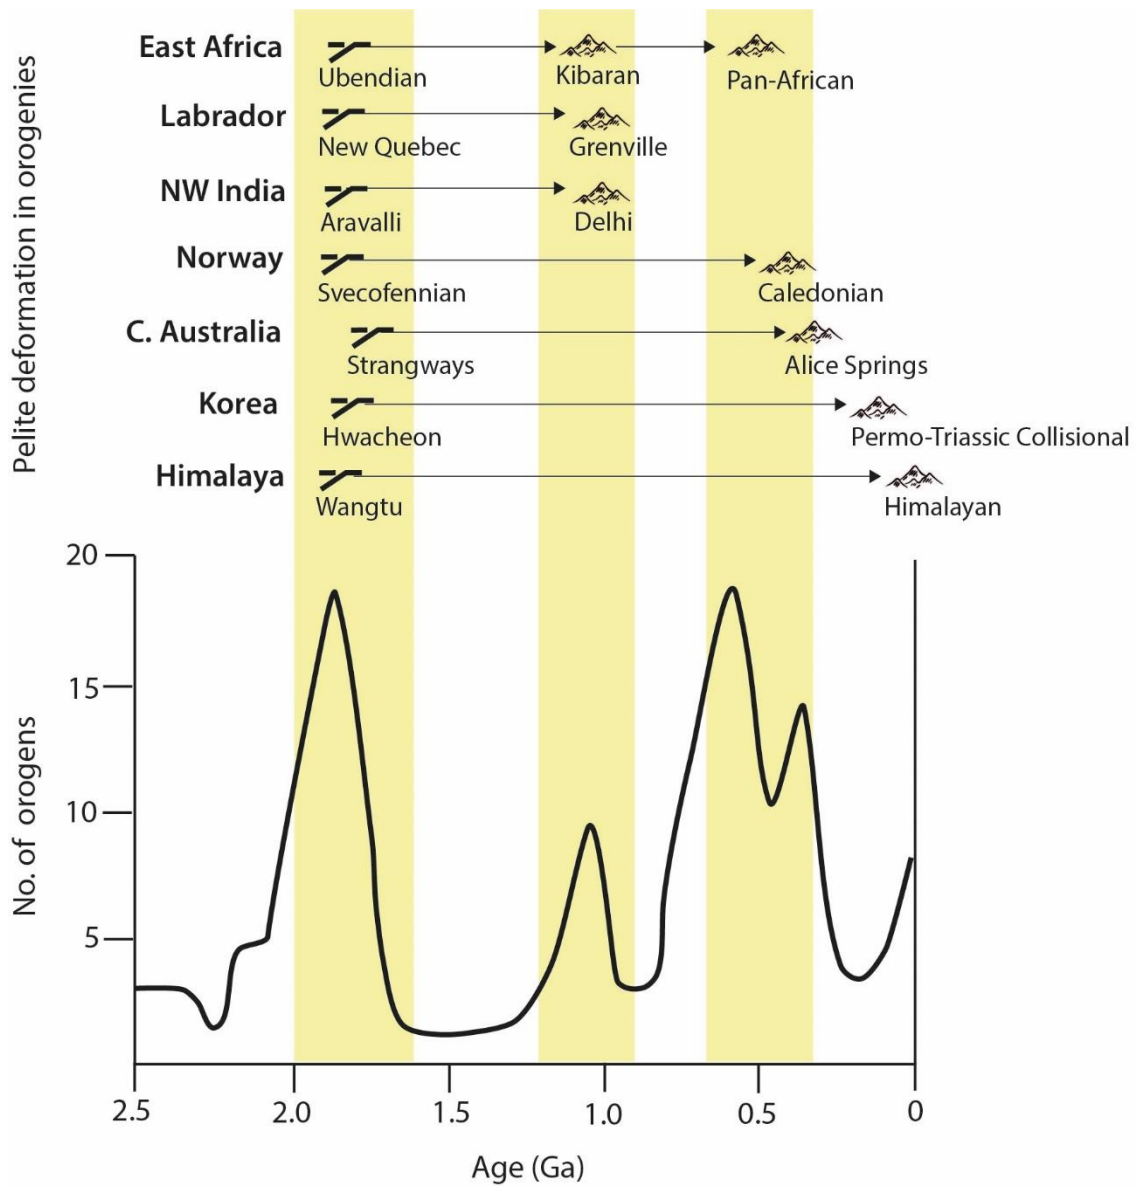

Fig. 4

**Table 1. Carbon contents and isotope compositions of carbonaceous units which accommodated deformation in orogens.**

Data sources in Supplementary Table 2.

| Orogen (age $t_o$ )                            | Carbonaceous Unit (age $t_c$ )                    | Maximum $\Delta t$ ( $t_c - t_o$ ) | Carbon content                | Carbon isotope composition (‰) | Response in orogen |
|------------------------------------------------|---------------------------------------------------|------------------------------------|-------------------------------|--------------------------------|--------------------|
| Pine Creek Orogen, Australia (2.02-1.85 Ga)    | Whites Fm. (2.02 Ga);<br>Koolpin Fm. (1.88 Ga)    | 170 Myr                            | Up to 10.4; 11.7 % TOC        | Koolpin<br>-27.6 to -31.1      | B, F, S, T         |
| Kimban Orogen, Australia (1.85-1.70 Ga)        | Hutchison Group (1.87 Ga)                         | 170 Myr                            | Up to 30+ % TOC, Graphite ore | -13.0 to -29.0                 | F, G, I, S, T      |
| Aravalli Orogen, India (1.8-1.74 Ga)           | Aravalli Supergroup (1.9-1.7 Ga)                  | 160 Myr                            | Up to 15 % TOC, Graphite ore  | -21.1 to -25.9                 | F, I, S, T         |
| Trans-North China Orogen, China (1.95-1.85 Ga) | Khondalite belt (2.0-1.95 Ga)                     | 150 Myr                            | Up to 30 % TOC, Graphite ore  | -24.6 to -29.0                 | F, G, S, T         |
| Jiao-Liao-Ji Orogen, China (1.94-1.86 Ga)      | Liaohe/Jingshan Groups (2.05-1.94 Ga)             | 190 Myr                            | Graphite ore                  | -18.6 to -21.7                 | D, F, S, T         |
| Akitkan Orogen, Russia (2.0-1.91 Ga)           | Khapchan Group, Udokan Series (2.1-1.9 Ga)        | 190 Myr                            | Up to 23 % TOC, Graphite ore  | -29.2 to -31.6                 | F, S, T            |
| Wopmay Orogen, Canada (1.9-1.8 Ga)             | Coronation Supergroup (1.88 Ga)                   | 80 Myr                             | Up to 9.1 % TOC               | -14.5 to -26.5                 | B, I, T            |
| Foxe Orogen, Canada (1.88-1.84 Ga)             | Piling Group, Bravo Lake Formation (1.92-1.89 Ga) | 80 Myr                             | Up to 5.6 % TOC               | -27.5 to -27.8                 | F, I, S, T         |

|                                                           |                                              |         |                              |                |               |
|-----------------------------------------------------------|----------------------------------------------|---------|------------------------------|----------------|---------------|
| Trans-Hudson Orogen, USA-Canada (1.83-1.79 Ga)            | Kisseynew Gneiss (1.85-1.84 Ga)              | 60 Myr  | Graphite ore                 | -17.9 to -29.8 | F, I, S, T    |
| Penokean Orogen, USA (1.89-1.82 Ga)                       | Animikie and Baraga Groups (1.88-1.83 Ga)    | 60 Myr  | Up to 44 % TOC, Graphite ore | -22.4 to -32.2 | D, G, I, T    |
| Torngat Orogen, Canada (1.91-1.82 Ga)                     | Tasiuyak Gneiss (1.94-1.88 Ga)               | 120 Myr | Up to 30 % TOC, Graphite ore | -24.8 to -31.7 | B, F, I, T    |
| Nagsugtoqidian Orogen, Greenland (1.88-1.83 Ga)           | Siportoq Supracrustals (2.00-1.92 Ga)        | 170 Myr | Up to 24 % TOC, Graphite ore | -18.1 to -31.0 | B, F, I, S, T |
| Ketilidian Orogen, Greenland (1.85-1.80 Ga)               | Sortis and Vallen Groups (2.0-1.9 Ga)        | 200 Myr | Up to 29 % TOC, Graphite ore | -22.3 to -32.5 | F, G, I, S, T |
| Laxfordian Orogen, UK (1.9-1.87 Ga)                       | Lewisian supracrustals (2.0-1.9 Ga)          | 130 Myr | Up to 10.7 % TOC             | -21.6 to -24.6 | F, I, S, T    |
| Svecofennian Orogen, Finland-Sweden-Norway (1.88-1.79 Ga) | Multiple graphitic schists (1.91-1.88 Ga)    | 120 Myr | Up to 25 % TOC, Graphite ore | -19.2 to -27.0 | F, I, S, T    |
| East Sarmatian Orogen, Belarus (2.10-2.07 Ga)             | Vorontsovka series (2.24-2.10 Ga)            | 170 Myr | Up to 18 % TOC, Graphite ore | -27.4 to -31.1 | S, T          |
| Birimian Orogen, West Africa (2.18-2.06 Ga)               | Lower Birimian (2.15-2.10 Ga)                | 90 Myr  | Up to 25 % TOC, Graphite ore | -23.5 to -31.1 | I, T          |
| Eburnean Orogen, Gabon-Congo (2.04-2.0 Ga)                | Ogooué complex, Francevillian (2.12-2.04 Ga) | 120 Myr | Up to 17 % TOC               | -27.1 to -46.2 | D, F, T       |

|                                               |                                              |         |                                 |                |            |
|-----------------------------------------------|----------------------------------------------|---------|---------------------------------|----------------|------------|
| Magondi Orogen,<br>Zimbabwe (2.06-1.96<br>Ga) | PiriWiri Group (2.2-<br>2.06 Ga)             | 240 Myr | Graphite ore                    | -23.6 to -24.2 | B, F, I, T |
| Minas Orogen,<br>Brazil (2.1-2.01 Ga)         | Itapecerica<br>khondalites<br>(2.08-2.07 Ga) | 70 Myr  | Up to 35 % TOC,<br>Graphite ore | -21.2 to -27.9 | B, F, S, T |

TOC = Total Organic Carbon. B, basal decollement; D, decollement; F, isoclinal folding; G, graphite thickening/in subduction zones; I, imbrication; S, shear zones; T, thrusting (especially bedding-parallel).



All Communications Earth & Environment manuscripts must include a section titled "Data Availability" at the end of the Methods section or main text (if no Methods). More information on this policy, is available at <http://www.nature.com/authors/policies/data/data-availability-statements-data-citations.pdf>.

In particular, the Data availability statement should include:

- Unique identifiers (such as DOIs and hyperlinks for datasets in public repositories)
- Accession codes where appropriate
- If applicable, a statement regarding data available with restrictions
- If a dataset has a Digital Object Identifier (DOI) as its unique identifier, we strongly encourage including this in the Reference list and citing the dataset in the Data Availability Statement.

Please refer to our data policies

at <http://www.nature.com/authors/policies/availability.html>.

## **Elevated biomass at 2 Ga triggered mountain building**

Response to Reviewers (Responses in BOLD)

Reviewer #1 Michael Brown

This paper proposes that increase in carbon in passive margin sedimentary sequences consequent upon the GOE facilitated Paleoproterozoic mountain building. I found the paper novel and of interest; it should be of interest to the community at large. The study is convincing and the paper will influence conceptual understanding about mountain building processes. My comments below are keyed by page/line number (I converted the pdf to a Word docx file; the pages/lines do not match perfectly, but a copy of the docx file is appended).

2/1-3. The first two sentences are highly unlikely to be correct (indeed, your own Figure 3 shows collision occurring before or by 2.1 Ga). It is the breakup of several supercratons in the early Paleoproterozoic that provide the passive margins along the trailing edges of cratons where organic carbon was buried prior to incorporation in the collisional orogens that suture Nuna and, eventually, Columbia. So, the logic must be that plate tectonics (i.e. a fragmented rigid lithosphere and a network of weak plate boundaries, with motion driven by stable subduction) had emerged by, say, c. 2.2 Ga or slightly earlier. The diachronous stabilization of cratons from c. 3.1 to c. 2.4 Ga or so and the 'mixed' signals in various geological datasets during that period suggest (to this

reviewer) that the period down to c. 2.4 Ga or so was one of transition from the pre-plate tectonics mode to the present (global) plate tectonics mode (consistent with the (slightly tongue-in-cheek) 1 Ga transition proposed by Bercovici and Ricard, 2014, Nature). See Brown et al., 2020, AnnRevEarthPlanetSci, for discussion. I doubt that supercraton breakup, stable subduction and craton drift have anything (much) to do with the rise of oxygen, but these steps must precede (even if not by much) the consequent burial of organic carbon. **WE HAVE NOW AVOIDED THE SIMPLISTIC CONFLATION OF PLATE TECTONICS AND MOUNTAIN BUILDING. THE SUPERCRATON FRAGMENTATION STAGE IS NOW REFERRED TO WITH CITATION.**

2/15 Suggest delete "continental" **WORD DELETED**

2/17 Suggest delete "plate tectonics, and" (or modify with an addition sentence) **SUPERFLUOUS WORDS OMITTED**

2/19 Take care with "an increase in the production of continental crust as recorded by zircon ages"! First, the oldest (double) peak in zircon ages is in the Neoproterozoic. Second, the debate about production vs preservation goes back to Hawkesworth et al., 2009, Science, and is not resolved. I suggest you simply leave out this clause. **REFERENCE TO ZIRCON AGES OMITTED**

2/21-22 In the references, Weller & St Onge is a study of a single eclogite boudin (it is set in a global context in their Figure 6 using the dataset of Brown, 2014). So, similar to the compilation of seismic images from multiple orogens by Wan et al., 2020, a reference to the most recent global dataset and discussion would be more appropriate (Brown and Johnson, 2019, American Mineralogist). **BROWN & JOHNSON 2019 IS ADDED. WELLER & St ONGE IS RETAINED AS IT IS STILL PERTINENT**

2/28 Plate tectonics must precede the development of high biomass (discussed above). **SENTENCE INSERTED TO STATE EARLIEST PALAEOPROTEROZOIC PLATE TECTONICS**

4/5 To avoid duplication, I would replace the first use of "exceptional" with "collisional" **WORD SUBSTITUTED AS SUGGESTED**

4/25 Suggest "marble" --> "carbonate" **WORD SUBSTITUTED AS SUGGESTED**

5/10 Figure 5G in Zhu et al. is based on the dataset of Brown and Johnson (2019, Mineralogical Magazine), and the peak in the 30 pt moving mean in the Paleoproterozoic is determined by 2 outliers at 7 GPa. These are 2 of 4 data that record low T/P conditions (i.e. blueschists, low-T eclogites and UHP metamorphism) prior to the late Tonian, and low T/P metamorphism relates to subduction rather than to collision.

The moving mean of P for collision-related metamorphism is shown in the top panel of Figure 11 in Brown and Johnson (2019, Mineralogical Magazine). There is an gradual increase of P in the Paleoproterozoic. **SENTENCE AMENDED TO AVOID REFERRING TO PRESSURE DATA**

6/2-4 Widespread orogeny is driven by plate tectonics that amalgamated the cratons into Nuna and, eventually, Columbia. The modern style of orogenesis is facilitated by the "abundant carbon"! **REWORDED TO EMPHASIZE INFLUENCE ON STYLE OF OROGENESIS**

8/6-10. This is an overinterpretation of the data that this reviewer cannot follow. Of the 7 localities for which P-T paths are shown in Supp. Fig. 6, only 2 appear to involve a younger event (Korea and Algeria). Of the other 5, 4 show P-T paths consistent with 'normal' rates of exhumation for the Paleoproterozoic, but I could not confirm the 5th (Trans-Hudson), which does not seem to come from the reference quoted (Skipton et al., 2017). This figure does not seem to provide strong support for the point the authors are trying to make. **THIS WAS AN UNFORTUNATE ATTEMPT TO CONFLATE TWO RELATED POINTS IN A SINGLE SENTENCE. WE HAVE NOW SEPARATED THE POINTS THAT P-T PATHS SHOW A MIX OF NORMAL AND REACTIVATED HISTORIES (SUPP FIG. 6), AND THAT REACTIVATION OCCURRED DURING THE MAIN PERIODS OF OROGENESIS (FIG. 4) THE TWO 1.87 Ga P-T PATHS (TRANS-HUDSON, INDIA) HAD THEIR LABELS TRANSPOSED, HENCE THE DISCREPENCY FROM SKIPTON ET AL. THIS HAS NOW BEEN CORRECTED. SHARP EYES, REVIEWER, THANKS!**

Reviewer #2 (Remarks to the Author):

COMMSENV-21-0396-T  
Parnell and Brolly  
CEE

Review by Ross N. Mitchell, Ph.D. ross.mitchell@mail.iggcas.ac.cn

The authors claim a peak in marine biomass at ca. 2.1–2.0 Ga (Lomagundi–Jatulit positive  $\delta^{13}\text{C}$  excursion and shungite deposits to follow) helped facilitate the immediately subsequent impressive orogenic peak of the Orosirian Period. Although I was compelled by the spatiotemporal link between the carbon-rich sediments indeed showing up as graphite in Orosirian orogens, I initially had my doubts about their being a causal link between the two phenomena. But the authors have won me over in their diligent approach to testing their fascinating hypothesis and any way they can think of. Surely others will find other means to do so upon reading this intriguing work once it is published.

This is a fascinating and well-executed paper that should be published as soon as possible. The authors build off their recent compilation work (Parnell+21\_Geo-Mag) to devise an incredible hypothesis. Unbelievably, they even seem to back it up with impressive knowledge of the relevant literature and exposition in effective figures and tables. I have made edits in the annotated PDF that hopefully improve the otherwise already excellent paper. My recommendation is thus to accept pending minor revisions. Some additional suggestions that might improve the paper are offered below too.

The abstract is good, but I'm not sure it does full justice to the depth of research the authors have done into the specific feasibility of the mechanism they propose. I know you want to be as broad/general as possible, but for those who will be immediately skeptical that spatiotemporal link doesn't mean a causative link (I had by doubts at first too!), a little more "meat on the bone" upfront might be nice. Consider editing the abstract a bit. **SEVERAL POINTS NOW AMPLIFIED IN ABSTRACT**

Figure 2: The time axis in figure 2 runs the opposite way to those in Figures 3 and 4 and it should be consistent. I personally prefer adopting the time moving forward to the right as in Figures 3 and 4. **THIS FIGURE HAS BEEN REDRAWN WITH TIME MOVING FORWARD TO THE RIGHT**

Figure 3: To make a stronger visual link between the sediment and orogen phase for each place, I'd recommend leaving no space between these two bars for each place (i.e., red right below blue without any space between the two records for each place). **FIGURE AMENDED SO NO SPACE BETWEEN BARS**

Supp Figure 3: Neat figure. quite convincing. if not published before, perhaps consider including in the main text? **NOW INCLUDED IN MAIN TEXT**

Supp Figure 5: To make a stronger visual link between the two sources for each place, I'd recommend leaving no space between these two bars for each place (i.e., red right below black without any space between the two records for each place). **FIGURE AMENDED SO NO SPACE BETWEEN BARS**

22nd Sep 21

Dear Professor Parnell,

Thank you for submitting your revised manuscript titled "Elevated biomass at 2 Ga triggered mountain building". I am delighted to say that we are happy, in principle, to publish a suitably revised version in Communications Earth & Environment under the open access CC BY license (Creative Commons Attribution v4.0 International License).

We therefore invite you to edit your manuscript one last time to comply with our format requirements and to maximise the accessibility and therefore the impact of your work.

#### EDITORIAL REQUESTS:

Please review our specific editorial comments and requests regarding your manuscript in the attached "Editorial Requests Table". Please outline your response to each request in the right hand column. Please upload the completed table with your manuscript files.

If you have any questions or concerns about any of our requests, please do not hesitate to contact me.

#### SUBMISSION INFORMATION:

In order to accept your paper, we require the files listed at the end of the Editorial Requests Table; the list of required files is also available at <https://www.nature.com/documents/commsj-file-checklist.pdf>.

#### OPEN ACCESS:

Communications Earth & Environment is a fully open access journal. Articles are made freely accessible on publication under a <http://creativecommons.org/licenses/by/4.0> target="\_blank"> CC BY license (Creative Commons Attribution 4.0 International License). This license allows maximum dissemination and re-use of open access materials and is preferred by many research funding bodies.

For further information about article processing charges, open access funding, and advice and support from Nature Research, please visit <https://www.nature.com/commsenv/about/open-access>

At acceptance, you will be provided with instructions for completing this CC BY license on behalf of all authors. This grants us the necessary permissions to publish your paper. Additionally, you will be asked to declare that all required third party permissions have been obtained, and to provide billing information in order to pay the article-processing charge (APC). **Please note that that we will not be able to move forward without having first received your payment information and third-party declarations and therefore we ask that you please have this information ready when submitting the**

final version of your manuscript.</b>

Please use the following link to submit the above items:

[link redacted]

\*\* This url links to your confidential home page and associated information about manuscripts you may have submitted or be reviewing for us. If you wish to forward this email to co-authors, please delete the link to your homepage first \*\*

We hope to hear from you within two weeks; please let us know if you need more time.

Best regards,

Joe Aslin

Associate Editor,  
Communications Earth & Environment  
<https://www.nature.com/commsenv/>  
Twitter: @CommsEarth

Joao Duarte, PhD  
Editorial Board Member  
Communications Earth & Environment  
[orcid.org/0000-0001-7505-3690](https://orcid.org/0000-0001-7505-3690)

## **Increased biomass and carbon burial 2 billion years ago triggered mountain building**

Response to Reviewers (Responses in **BOLD**)

(all responses made at previous review stage)

Reviewer #1 Michael Brown

This paper proposes that increase in carbon in passive margin sedimentary sequences consequent upon the GOE facilitated Paleoproterozoic mountain building. I found the paper novel and of interest; it should be of interest to the community at large. The study is convincing and the paper will influence conceptual understanding about mountain building processes. My comments below are keyed by page/line number (I converted the pdf to a Word docx file; the pages/lines do not match perfectly, but a copy of the docx file is appended).

2/1-3. The first two sentences are highly unlikely to be correct (indeed, your own Figure 3 shows collision occurring before or by 2.1 Ga). It is the breakup of several supercratons in the early Paleoproterozoic that provide the passive margins along the trailing edges of cratons where organic carbon was buried prior to incorporation in the collisional orogens that suture Nuna and, eventually, Columbia. So, the logic must be that plate tectonics (i.e. a fragmented rigid lithosphere and a network of weak plate boundaries, with motion driven by stable subduction) had emerged by, say, c. 2.2 Ga or slightly earlier. The diachronous stabilization of cratons from c. 3.1 to c. 2.4 Ga or so and the 'mixed' signals in various geological datasets during that period suggest (to this reviewer) that the period down to c. 2.4 Ga or so was one of transition from the pre-plate tectonics mode to the present (global) plate tectonics mode (consistent with the (slightly tongue-in-cheek) 1 Ga transition proposed by Bercovici and Ricard, 2014, Nature). See Brown et al., 2020, AnnRevEarthPlanetSci, for discussion. I doubt that supercraton breakup, stable subduction and craton drift have anything (much) to do with the rise of oxygen, but these steps must precede (even if not by much) the consequent burial of organic carbon. **WE HAVE NOW AVOIDED THE SIMPLISTIC CONFLATION OF PLATE TECTONICS AND MOUNTAIN BUILDING. THE SUPERCRAATON FRAGMENTATION STAGE IS NOW REFERRED TO WITH CITATION.**

2/15 Suggest delete "continental" **WORD DELETED**

2/17 Suggest delete "plate tectonics, and" (or modify with an addition sentence)  
**SUPERFLUOUS WORDS OMITTED**

2/19 Take care with "an increase in the production of continental crust as recorded by

zircon ages"! First, the oldest (double) peak in zircon ages is in the Neoproterozoic. Second, the debate about production vs preservation goes back to Hawkesworth et al., 2009, Science, and is not resolved. I suggest you simply leave out this clause. **REFERENCE TO ZIRCON AGES OMITTED**

2/21-22 In the references, Weller & St Onge is a study of a single eclogite boudin (it is set in a global context in their Figure 6 using the dataset of Brown, 2014). So, similar to the compilation of seismic images from multiple orogens by Wan et al., 2020, a reference to the most recent global dataset and discussion would be more appropriate (Brown and Johnson, 2019, American Mineralogist). **BROWN & JOHNSON 2019 IS ADDED. WELLER & St ONGE IS RETAINED AS IT IS STILL PERTINENT**

2/28 Plate tectonics must precede the development of high biomass (discussed above). **SENTENCE INSERTED TO STATE EARLIEST PALAEOPROTEROZOIC PLATE TECTONICS**

4/5 To avoid duplication, I would replace the first use of "exceptional" with "collisional" **WORD SUBSTITUTED AS SUGGESTED**

4/25 Suggest "marble" --> "carbonate" **WORD SUBSTITUTED AS SUGGESTED**

5/10 Figure 5G in Zhu et al. is based on the dataset of Brown and Johnson (2019, Mineralogical Magazine), and the peak in the 30 pt moving mean in the Paleoproterozoic is determined by 2 outliers at 7 GPa. These are 2 of 4 data that record low T/P conditions (i.e. blueschists, low-T eclogites and UHP metamorphism) prior to the late Tonian, and low T/P metamorphism relates to subduction rather than to collision. The moving mean of P for collision-related metamorphism is shown in the top panel of Figure 11 in Brown and Johnson (2019, Mineralogical Magazine). There is an gradual increase of P in the Paleoproterozoic. **SENTENCE AMENDED TO AVOID REFERRING TO PRESSURE DATA**

6/2-4 Widespread orogeny is driven by plate tectonics that amalgamated the cratons into Nuna and, eventually, Columbia. The modern style of orogenesis is facilitated by the "abundant carbon"! **REWORDED TO EMPHASIZE INFLUENCE ON STYLE OF OROGENESIS**

8/6-10. This is an overinterpretation of the data that this reviewer cannot follow. Of the 7 localities for which P-T paths are shown in Supp. Fig. 6, only 2 appear to involve a younger event (Korea and Algeria). Of the other 5, 4 show P-T paths consistent with 'normal' rates of exhumation for the Paleoproterozoic, but I could not confirm the 5th (Trans-Hudson), which does not seem to come from the reference quoted (Skipton et al., 2017). This figure does not seem to provide strong support for the point the authors are



trying to make. **THIS WAS AN UNFORTUNATE ATTEMPT TO CONFLATE TWO RELATED POINTS IN A SINGLE SENTENCE. WE HAVE NOW SEPARATED THE POINTS THAT P-T PATHS SHOW A MIX OF NORMAL AND REACTIVATED HISTORIES (SUPP FIG. 6), AND THAT REACTIVATION OCCURRED DURING THE MAIN PERIODS OF OROGENESIS (FIG. 4) THE TWO 1.87 Ga P-T PATHS (TRANS-HUDSON, INDIA) HAD THEIR LABELS TRANSPOSED, HENCE THE DISCREPENCY FROM SKIPTON ET AL. THIS HAS NOW BEEN CORRECTED. SHARP EYES, REVIEWER, THANKS!**

Reviewer #2 (Remarks to the Author):

COMMSENV-21-0396-T  
Parnell and Brolly  
CEE

Review by Ross N. Mitchell, Ph.D. ross.mitchell@mail.iggcas.ac.cn

The authors claim a peak in marine biomass at ca. 2.1–2.0 Ga (Lomagundi–Jatulit positive  $\delta^{13}\text{C}$  excursion and shungite deposits to follow) helped facilitate the immediately subsequent impressive orogenic peak of the Orosirian Period. Although I was compelled by the spatiotemporal link between the carbon-rich sediments indeed showing up as graphite in Orosirian orogens, I initially had my doubts about their being a causal link between the two phenomena. But the authors have won me over in their diligent approach to testing their fascinating hypothesis and any way they can think of. Surely others will find other means to do so upon reading this intriguing work once it is published.

This is a fascinating and well-executed paper that should be published as soon as possible. The authors build off their recent compilation work (Parnell+21\_Geo-Mag) to devise an incredible hypothesis. Unbelievably, they even seem to back it up with impressive knowledge of the relevant literature and exposition in effective figures and tables. I have made edits in the annotated PDF that hopefully improve the otherwise already excellent paper. My recommendation is thus to accept pending minor revisions. Some additional suggestions that might improve the paper are offered below too.

The abstract is good, but I'm not sure it does full justice to the depth of research the authors have done into the specific feasibility of the mechanism they propose. I know you want to be as broad/general as possible, but for those who will be immediately skeptical that spatiotemporal link doesn't mean a causative link (I had my doubts at first too!), a little more "meat on the bone" upfront might be nice. Consider editing the abstract a bit. **SEVERAL POINTS NOW AMPLIFIED IN ABSTRACT**

Figure 2: The time axis in figure 2 runs the opposite way to those in Figures 3 and 4 and it should be consistent. I personally prefer adopting the time moving forward to the right as in Figures 3 and 4. **THIS FIGURE HAS BEEN REDRAWN WITH TIME MOVING FORWARD TO THE RIGHT**

Figure 3: To make a stronger visual link between the sediment and orogen phase for each place, I'd recommend leaving no space between these two bars for each place (i.e., red right below blue without any space between the two records for each place). **FIGURE AMENDED SO NO SPACE BETWEEN BARS**

Supp Figure 3: Neat figure. quite convincing. if not published before, perhaps consider including in the main text? **NOW INCLUDED IN MAIN TEXT**

Supp Figure 5: To make a stronger visual link between the two sources for each place, I'd recommend leaving no space between these two bars for each place (i.e., red right below black without any space between the two records for each place). **FIGURE AMENDED SO NO SPACE BETWEEN BARS**
