# Supplementary material for: Increased biomass and carbon burial 2 billion years ago triggered mountain building
Source: Springer Nature journal article supplement (doi:10.1038/s43247-021-00313-5), 2021-11-26
Supplement: 43247_2021_313_MOESM2_ESM.pdf [file 43247_2021_313_MOESM2_ESM.pdf]

# Increased biomass and carbon burial 2 billion years ago triggered mountain building

John Parnell\*, Connor Brolly

School of Geosciences, University of Aberdeen, Aberdeen AB24 3UE, United Kingdom

\*Corresponding Author: [J.Parnell@abdn.ac.uk](mailto:J.Parnell@abdn.ac.uk)

Supplementary Information

### Supplementary Table

**Supplementary Table 1. Phanerozoic record of twenty orogens in which highly carbonaceous shales supported deformation by focussing thrust detachment**

| Location                     | Orogen (age $t_o$ )                         | Shale Period (age $t_c$ ) | Stratigraphy         | Maximum $\Delta t$ ( $t_c - t_o$ ) | Shale TOC         | Reference     |
|------------------------------|---------------------------------------------|---------------------------|----------------------|------------------------------------|-------------------|---------------|
| Southern Norway              | Caledonian Orogen (Silurian)                | Cambrian                  | Alum Shale           | <100 Myr                           | up to 14 % TOC    | <sup>1</sup>  |
| Xiuwu Basin, China           | Qinling Orogen (Carboniferous-Triassic)     | Cambrian                  | Qiongzhusi Fm.       | <300 Myr                           | average 2.8 % TOC | <sup>2</sup>  |
| Southern Uplands, UK         | Caledonian Orogen (Silurian)                | Ordovician                | Moffat Shale Gp.     | <100 Myr                           | up to 2.2 % TOC   | <sup>3</sup>  |
| Sichuan Basin, China         | Qinling Orogen (Carboniferous-Triassic)     | Ord-Silurian              | Wufeng-Longmaxi Fm.  | <300 Myr                           | average 3 % TOC   | <sup>4</sup>  |
| Sub-Andean zone, Bolivia     | Sub-Andean Fold Belt (Paleogene)            | Silurian                  | Kirusilla Fm.        | <400 Myr                           | average 2 % TOC   | <sup>5</sup>  |
| Variscides, Poland           | Variscan Orogen (Carboniferous)             | Silurian                  | Ja Member            | <100 Myr                           | average 3 % TOC   | <sup>6</sup>  |
| Appalachian Basin, USA       | Appalachian Orogen (Devonian-Carboniferous) | Devonian                  | Marcellus Shale etc. | <100 Myr                           | average 4 % TOC   | <sup>7</sup>  |
| Cordillera, BC, Canada       | Cordilleran Orogen (Cretaceous)             | Devonian                  | Besa River Fm.       | <300 Myr                           | up to 8 % TOC     | <sup>8</sup>  |
| NE Brooks Range, Alaska, USA | Brooks Range Fold Belt (Jurassic)           | Carboniferous             | Kayak Shale          | <150 Myr                           | up to 4.1 % TOC   | <sup>9</sup>  |
| Central Thailand             | Khao Khwang Fold Belt (Triassic)            | Permian                   | Sap Bon Fm.          | <100 Myr                           | up to 4 % TOC     | <sup>10</sup> |
| Karoo Basin, South Africa    | Cape Fold Belt (Triassic)                   | Permian                   | Karoo Supergroup     | <100 Myr                           | average 4.5 % TOC | <sup>11</sup> |

|                                 |                                             |            |                    |          |                   |               |
|---------------------------------|---------------------------------------------|------------|--------------------|----------|-------------------|---------------|
| West Timor, Indonesia           | Timor Orogen (Neogene)                      | Triassic   | Aitutu Fm.         | <200 Myr | up to 8.1 % TOC   | <sup>12</sup> |
| Chartreuse Fold belt, France    | Chartreuse Fold Belt (Cretaceous-Paleogene) | Jurassic   | Toarcian-Aalenian  | <150 Myr | up to 4.5 % TOC   | <sup>13</sup> |
| Svalbard, Norway                | Eurekan Orogen (Paleogene)                  | Jurassic   | Janusfjellet Fm.   | <200 Myr | average 4 % TOC   | <sup>14</sup> |
| Deep Basin, Alberta, Canada     | Rocky Mountains FB (Cretaceous-Paleogene)   | Cretaceous | Cardium Fm.        | <100 Myr | average 2.5 % TOC | <sup>15</sup> |
| Andes, Venezuela                | Andean Orogen (Jurassic-Paleogene)          | Cretaceous | La Luna-Colon Fms. | <100 Myr | average 3.8 % TOC | <sup>16</sup> |
| Parras Basin, Mexico            | Laramide Orogen (Cretaceous-Paleogene)      | Cretaceous | Parras Shale       | <100 Myr | up to 2.2 % TOC   | <sup>17</sup> |
| Magellan Basin, Chile/Argentina | Patagonian Fold Belt (Cretaceous-Paleogene) | Cretaceous | Zapata Fm.         | <100 Myr | up to 3 % TOC     | <sup>18</sup> |
| Carpathians, Czech Republic     | Carpathian Orogen (Paleogene)               | Cretaceous | Wierzowice Shale   | <100 Myr | average 3.7 % TOC | <sup>19</sup> |
| Naga Thrust Triangle, India     | Naga Thrust Belt (Neogene)                  | Oligocene  | Barail Shale       | <30 Myr  | average 3.8 % TOC | <sup>20</sup> |

## Supplementary Note

**Supplementary Note 1. Data sources for chronology of carbonaceous sediments and deformation in Palaeoproterozoic orogens, carbon compositions of sediments (summarized in Table 1), isotopic compositions of organic carbon, and styles of deformation.**

### **Pine Creek Orogen, Australia** (2.02-1.85 Ga)<sup>21</sup>

Whites Fm. (2.02 Ga); Koolpin Fm. (1.88 Ga)<sup>21</sup>

Up to 10.4; 11.7 % TOC<sup>22</sup>

Koolpin -27.6 to -31.1 ‰<sup>23</sup>

B, F, S, T<sup>24</sup>

### **Kimban Orogen, Australia** (1.85-1.70 Ga)<sup>25</sup>

Hutchison Group (1.87 Ga)<sup>26</sup>

Up to 30+ % TOC, Graphite ore<sup>27</sup>

-13.0 to -29.0 ‰<sup>28</sup>

F, G, I, S, T<sup>29</sup>

### **Aravalli Orogen, India** (1.8-1.74 Ga)<sup>30</sup>

Aravalli Supergroup (1.9-1.7 Ga)<sup>31</sup>

Up to 15 % TOC, Graphite ore<sup>32</sup>

-21.1 to -25.9 ‰<sup>33</sup>

F, I, S, T<sup>34,35</sup>

### **Trans-North China Orogen, China** (1.95-1.85 Ga)<sup>36</sup>

Khondalite belt (2.0-1.95 Ga)<sup>36</sup>

Up to 30 % TOC, Graphite ore<sup>37</sup>

-24.6 to -29.0 ‰<sup>38</sup>

F, G, S, T<sup>38</sup>

### **Jiao-Liao-Ji Orogen, China** (1.94-1.86 Ga)<sup>39</sup>

Liaohe/Jingshan Groups (2.05-1.94 Ga)<sup>40</sup>

Graphite ore<sup>41</sup>

-18.6 to -21.7 ‰<sup>41</sup>

D, F, S, T<sup>40,42</sup>

**Akitkan Orogen, Russia** (2.0-1.91 Ga)<sup>43</sup>

Khapchan Group, Udokan Series (2.1-1.9 Ga)<sup>44</sup>

Up to 23 % TOC, Graphite ore<sup>45</sup>

-29.2 to -31.6 ‰<sup>43</sup>

F, S, T<sup>46</sup>

**Wopmay Orogen, Canada** (1.9-1.8 Ga)<sup>47</sup>

Coronation Supergroup (1.88 Ga)<sup>48</sup>

Up to 9.1 % TOC<sup>49</sup>

-14.5 to -26.5 ‰<sup>23</sup>

B, I, T<sup>47</sup>

**Foxe Orogen, Canada** (1.88-1.84 Ga)<sup>50</sup>

Piling Group, Bravo Lake Formation (1.92-1.89 Ga)<sup>50</sup>

Up to 5.6 % TOC<sup>51</sup>

-27.5 to -27.8 ‰<sup>51</sup>

F, I, S, T<sup>52</sup>

**Trans-Hudson Orogen, USA-Canada** (1.83-1.79 Ga)<sup>53</sup>

Kisseynew Gneiss (1.85-1.84 Ga)<sup>53</sup>

Graphite ore<sup>54</sup>

-17.9 to -29.8 ‰<sup>55</sup>

F, I, S, T<sup>50</sup>

**Penokean Orogen, USA** (1.89-1.82 Ga)<sup>56</sup>

Animikie and Baraga Groups (1.88-1.83 Ga)<sup>56</sup>

Up to 44 % TOC, Graphite ore<sup>57</sup>

-22.4 to -32.2 ‰<sup>57</sup>

D, G, I, T<sup>58,59</sup>

**Torngat Orogen, Canada** (1.91-1.82 Ga)<sup>60</sup>

Tasiuyak Gneiss (1.94-1.88 Ga)<sup>60</sup>

Up to 30 % TOC, Graphite ore<sup>61</sup>

-24.8 to -31.7 ‰<sup>62</sup>

B, F, I, T<sup>63</sup>

**Nagssugtoqidian Orogen, Greenland** (1.88-1.83 Ga)<sup>64</sup>

Siportoq Supracrustals (2.00-1.92 Ga)<sup>65</sup>

Up to 24 % TOC, Graphite ore<sup>66</sup>

-18.1 to -31.0 ‰<sup>67</sup>

B, F, I, S, T<sup>68,69</sup>

**Ketilidian Orogen, Greenland** (1.85-1.80 Ga)<sup>64</sup>

Sortis and Vallen Groups (2.0-1.9 Ga)<sup>70</sup>

Up to 29 % TOC, Graphite ore<sup>66</sup>

-22.3 to -32.5 ‰<sup>71</sup>

F, G, I, S, T<sup>72</sup>

**Laxfordian Orogen, UK** (1.9-1.87 Ga)<sup>73</sup>

Lewisian supracrustals (2.0-1.9 Ga)<sup>74</sup>

Up to 10.7 % TOC

-21.6 to -24.6 ‰<sup>75</sup>

F, I, S, T<sup>74</sup>

**Svecofennian Orogen, Finland-Sweden-Norway** (1.88-1.79 Ga)<sup>76</sup>

Multiple graphitic schists (1.91-1.88 Ga)<sup>77</sup>

Up to 15 % TOC, Graphite ore<sup>78</sup>

-19.2 to -27.0 ‰<sup>77</sup>

F, I, S, T<sup>79</sup>

**East Sarmatian Orogen, Belarus** (2.10-2.07 Ga)<sup>80</sup>

Vorontsovka Series (2.24-2.1 Ga)<sup>80</sup>

Up to 18 % TOC, Graphite ore<sup>81</sup>

-27.4 to -31.1 ‰<sup>82</sup>

S, T<sup>83</sup>

**Birimian Orogen, West Africa** (2.18-2.06 Ga)<sup>84</sup>

Lower Birimian (2.15-2.10 Ga)<sup>84</sup>

Up to 25 % TOC, Graphite ore<sup>85</sup>

-23.5 to -31.1 ‰<sup>85</sup>

I, T<sup>86</sup>

**Eburnean Orogen, Gabon-Congo** (2.04-2.0 Ga)<sup>87</sup>

Ogooué complex, Francevillian (2.12-2.04 Ga)<sup>87</sup>

Up to 17 % TOC<sup>88</sup>

-27.1 to -46.2 ‰<sup>88</sup>

D, F, T<sup>89</sup>

**Magondi Orogen, Zimbabwe** (2.06-1.96 Ga)<sup>90</sup>

PiriWiri Group (2.2-2.06 Ga)<sup>90</sup>

Graphite ore<sup>90</sup>

-23.6 to -24.2 ‰<sup>23</sup>

B, F, I, T<sup>91</sup>

**Minas Orogen, Brazil** (2.1-2.01 Ga)<sup>92</sup>

Itapeceira khondalites (2.08-2.07 Ga)<sup>93</sup>

Up to 35 % TOC, Graphite ore<sup>94,95</sup>

-21.2 to -27.9 ‰<sup>92</sup>

B, F, S, T<sup>94</sup>

TOC = Total Organic Carbon. B, basal decollement; D, decollement; F, isoclinal folding; G, graphite thickening/in subduction zones; I, imbrication; S, shear zones; T, thrusting (especially bedding-parallel).

### Supplementary References for Data sources for Palaeoproterozoic and Phanerozoic orogens (Tables 1, S1, Note 1)

1. Schovsbo, N.H., Nielsen, A.T., Harstad, A.O. & Bruton, D.L. Stratigraphy and geochemical composition of the Cambrian Alum Shale Formation in the Porsgrunn core, Skien–Langesund district, southern Norway. *Bulletin of the Geological Society of Denmark* **66**, 1-20 (2018).
2. Zhang, K. et al. Analysis of Lower Cambrian shale gas composition, source and accumulation pattern in different tectonic backgrounds: A case study of Weiyuan Block in the Upper Yangtze region and Xiuwu Basin in the Lower Yangtze region. *Fuel* **263**, 115978 (2020).
3. Needham, D.T. Deformation in Moffat Shale detachment zones in the western part of the Scottish Southern Uplands. *Geological Magazine* **141**, 441-453 (2004).
4. Zheng, Y., Liao, Y., Wang, Y., Xiong, Y. & Peng, P. Organic geochemical characteristics, mineralogy, petrophysical properties, and shale gas prospects of the Wufeng–Longmaxi shales in Sanquan Town of the Nanchuan District, Chongqing. *AAPG Bulletin* **102**, 2239-2265 (2018).
5. Moretti, I., Labaume, P., Sheppard, S.M.F. & Boulègue, J. Compartmentalisation of fluid migration pathways in the sub-Andean Zone, Bolivia. *Tectonophysics* **348**, 5-24 (2002).
6. Kufraša, M., Stypa, A., Krzywiec, P. & Słonka, Ł. Late Carboniferous thin-skinned deformation in the Lublin Basin, SE Poland: Results of combined seismic data interpretation, structural restoration and subsidence analysis. *Annales Societatis Geologorum Poloniae* **89**, 175-194 (2019).
7. Roen, J.B. Geology of the Devonian black shales of the Appalachian Basin. *Organic Geochemistry* **5**, 241-254 (1984).
8. Lane, L.S., Fallas, K.M. & Miles, W.F. Cordilleran structural geometry in the Fort Liard Region: Influence of subsurface features. *AAPG Search and Discovery article #90225* (2002).
9. Wallace, W.K. Detachment folds above a passive-roof duplex: An example from the northeastern Brooks Range, Alaska. *Alaska Division of Geological and Geophysical Surveys Public Data File* **92-9** (1992).
10. Hansberry, R.L., King, R., Collins, A.S. & Morley, C.K. Complex structure of an upper-level shale detachment zone: Khao Khwang fold and thrust belt, Central Thailand. *Journal of Structural Geology* **67**, 140-153 (2014).
11. Geel, C., de Wit, M., Booth, P., Schulz, H-M. & Horsfield, B. Palaeo-environment, diagenesis and characteristics of Permian black shales in the Lower Karoo Supergroup flanking the Cape Fold Belt near Jansenville, Eastern Cape, South Africa: Implications for the shale gas potential of the Karoo Basin. *South African Journal of Geology* **118**, 249-274 (2015).
12. Villeneuve, M., Harsolumakso, A.H., Cornée, J.J. & Bellon, H. Structure of West Timor (East Indonesia) along a north-south cross section. *Géologie Méditerranéenne* **26**, 127-142 (1999).
13. Berthelon, J., Sassi, W. & Burov, E. Fluid overpressures and decollements in source rocks – Application of thermo-mechanical models to the Subalpine Chains. *AAPG Search and Discovery Article #41859* (2016).
14. Vorren, T.O. et al. *Arctic Geology and Petroleum Potential*. Elsevier, Amsterdam (2013).



15. Hart, B.S., Varban, B.L., Marfurt, K.J. & Plint, A.G. Blind thrusts and fault-related folds in the Upper Cretaceous Alberta Group, deep basin, west-central Alberta: implications for fractured reservoirs. *Bulletin of Canadian Petroleum Geology* **55**, 125-137 (2007).
16. De Toni, B. & Kellogg J. Seismic evidence for blind thrusting of the northwestern flank of the Venezuelan Andes. *Tectonics* **12**, 1393-1409 (1993).
17. Deville, E. et al. Shale tectonic processes: Field evidence from the Parras Basin (north-eastern Mexico). *Marine and Petroleum Geology* **122**, 104688 (2020).
18. Betka, P., Klepeis, K. & Mosher, S. Along-strike variation in crustal shortening and kinematic evolution of the base of a retroarc fold-and-thrust belt: Magallanes, Chile 53°S–54°S. *Bulletin of the Geological Society of America* **127**, 1108-1134 (2015).
19. Oszczytko, N. & Oszczytko – Clowes, M. Stages of development in the Polish Carpathian Foredeep Basin. *Central European Journal of Geosciences* **4**, 138-162 (2012).
20. Michael, B. et al. Understanding the deformation of the Naga Thrust Triangle Zone, NE India, using structural modeling of 2D seismic data. *AAPG Search and Discovery Article #50822* (2013).
21. Hollis, J.A. & Wygralak, A.S. A review of the geology and uranium, gold and iron ore deposits of the Pine Creek Orogen. *Episodes* **35**, 264-272 (2012).
22. Matthäi, S.K. & Henley, R.W. Geochemistry and depositional environment of the gold-mineralized Proterozoic Koolpin Formation, Pine Creek Inlier, northern Australia: a comparison with modern shale sequences. *Precambrian Research* **78**, 211-235 (1996).
23. Karhu, J.A. & Holland, H.D. Carbon isotopes and the rise of atmospheric oxygen. *Geology* **24**, 867-870 (1996).
24. Needham, R.S., Stuart-Smith, P.G. & Page, R.W. Tectonic evolution of the Pine Creek Inlier, Northern Territory. *Precambrian Research* **20-21**, 543-564 (1988).
25. Reid, A., Hand, M., Jagodzinski, E., Kelsey, D. & Pearson, N. Paleoproterozoic orogenesis in the southeastern Gawler Craton, South Australia. *Australian Journal of Earth Sciences* **55**, 449-471 (2008).
26. Szpunar, M., Hand, M., Barovich, K., Jagodzinski, E. & Belousova, E. Isotopic and geochemical constraints on the Paleoproterozoic Hutchison Group, southern Australia: Implications for Paleoproterozoic continental reconstructions. *Precambrian Research* **187**, 99-126 (2011).
27. Keeling, J. Graphite: properties, uses and South Australian resources. *MESA Journal* **84**, 28-41 (2017).
28. Taylor, W.R. & Berry, R.F. Origin of the Proterozoic graphite deposits of the southern Eyre Peninsula, South Australia. 10<sup>th</sup> Australian Geological Convention, February 4-9, 1990, University of Tasmania, Hobart, Abstracts, Geological Society of Australia **25**, 230-231 (1990).
29. Vassallo, J.J. & Wilson, C.J.L. Structural repetition of the Hutchison Group metasediments, Eyre Peninsula, South Australia. *Australian Journal of Earth Sciences* **48**, 331-345 (2001).
30. Prakash, A., Saha, A., Petrik, I., Janak, M. & Bhattacharya, A. Metamorphic evolution of Palaeoproterozoic anatectic migmatites in the eastern part of the Aravalli–Delhi Fold Belt, India: constraints from thermodynamic modelling and monazite dating. *Geological Magazine* **155**, 955-978 (2018).
31. McKenzie, N.R. et al. New age constraints for the Proterozoic Aravalli–Delhi successions of India and their implications. *Precambrian Research* **238**, 120-128 (2013).
32. Rao, M.S., Fareeduddin, Godhavari, K.S., Chander, S. & Sisodia, C.P. Carbonaceous metaexhalite of shungitic affinity in Palaeoproterozoic Aravalli Supergroup, Dugocha area, Rajasthan. *Journal of the Geological Society of India* **63**, 522-532 (2004).

33. Deb, M. Sulfur and carbon isotope compositions in the stratiform Zn-Pb-Cu sulphide deposits of the Rajpura-Dariba belt, Rajasthan, NW India: A model for ore genesis. *Mineralium Deposita* **21**, 313-321 (1986).
34. Din, S.U. & Iqbaluddin. Thrust controlled lineaments of the Aravalli-Delhi Fold Belt, Rajasthan, India mapped from Landsat TM image. *Journal of the Indian Society of Remote Sensing* **28**, 47-58 (2000).
35. Hahn, G. et al. Deformation in the Aravalli Supergroup, Aravalli-Delhi Mobile Belt, NW India and Tectonic Significance. T. K. Biswal et al. (eds.), *Structural Geometry of Mobile Belts of the Indian Subcontinent*. Springer Nature, Switzerland (2020).
36. Liu, P.H. et al. Spatial distribution, P–T–t paths, and tectonic significance of high-pressure mafic granulites from the Daqingshan–Wulashan Complex in the Khondalite Belt, North China Craton. *Precambrian Research* **303**, 687-708 (2017).
37. Yang, Q., Santosh, M. & Wada, H. Graphite mineralization in Paleoproterozoic khondalites of the North China Craton: A carbon isotope study. *Precambrian Research* **255**, 641-652 (2014).
38. Zhong, Y., Mac, X.D., Lia, H.K. & Zhaid, M.G. Revisit and comparative analysis of the typical graphite deposits in the Paleoproterozoic khondalite series, western North China Craton: Implications for genesis, depositional environment and prospecting potential. *Ore Geology Reviews* **109**, 370-380 (2019).
39. Yang, C. et al. Tectonics of the Paleoproterozoic Jiao-Liao-Ji orogenic belt in the Liaodong peninsula, North China Craton: A review. *Journal of Asian Earth Sciences* **176**, 141-156 (2019).
40. Tian, Z. et al. Polyphase structural deformation of low- to medium-grade metamorphic rocks of the Liaohe Group in the Jiao-Liao-Ji Orogenic Belt, North China Craton: Correlations with tectonic evolution. *Precambrian Research* **303**, 641-659 (2017).
41. Li, K., Chen, Y., She, Z., Tang, H. & Chen, W. Carbon isotope compositions and geochemical characteristics of the Zhangshe graphite deposit of the Jingshan Group, Jiaobei. *Earth Science Frontiers* **25**, 19-33 (2018).
42. Li, S. et al. Paleoproterozoic structural evolution of the southern segment of the Jiao-Liao-Ji Belt, North China Craton. *Precambrian Research* **200-203**, 59-73 (2012).
43. Danilova Yu.V. et al. New data on age and nature of carbonization within southern flank of the Baikal ledge of the Siberian craton basement. *Geodynamics & Tectonophysics* **8**, 441–444 (2017).
44. Gusev, N., Sergeeva L. & Skublov, S.G. Dating the sedimentary protolith of the Daldyn Group quartzite, Anabar Shield, Russia: New detrital zircon constraints. *Geosciences* **10**, doi: 10.3390/geosciences10060208 (2020).
45. Abramov, B.N. The formation of black shale deposits in the southern environs of the Siberian Platform (Kodaro–Udokanskaya and Tallai–Karalonskaya Zones). *Doklady Earth Sciences* **449**, 371-374 (2013).
46. Yudovskaya, M.A., Distler, V.V., Prokofiev, V. Yu. & Akinfiev, N.N. Gold mineralisation and orogenic metamorphism in the Lena province of Siberia as assessed from Chertovo Koryto and Sukhoi Log deposits. *Geoscience Frontiers* **7**, 453-481 (2016).
47. St-Onge, M.R., King, J.E., & Dalziel, I.W.D. Evolution of regional metamorphism during back-arc stretching and subsequent crustal shortening in the 1.9 Ga Wopmay Orogen, Canada. *Philosophical Transactions of the Royal Society of London* **A321**, 199–219 (1987).
48. St. Onge, M.R. & Davis, W.J. Wopmay orogen revisited: Phase equilibria modeling, detrital zircon geochronology, and U-Pb monazite dating of a regional Buchan-type metamorphic sequence. *Geological Society of America Bulletin* **130**, 678-704 (2018).

49. Strauss, H. & Moore, T.B. Abundances and isotopic composition of carbon and sulfur species in whole rock and kerogen samples. In: Schopf, J.W. & Klein, C. (eds) *The Proterozoic Biosphere: A Multidisciplinary Study*. Cambridge University Press, Cambridge, 709-798 (1992).
50. Corrigan, D., Pehrsson, S., Wodicka, S. & de Kemp, E. The Palaeoproterozoic Trans-Hudson Orogen: a prototype of modern accretionary processes. *Geological Society, London, Special Publications* **327**, 457-479 (2009).
51. Partin, C.A., Bekker, A., Planavsky, N.J. & Lyons, T.W. Euxinic conditions recorded in the ca. 1.93 Ga Bravo Lake Formation, Nunavut (Canada): Implications for oceanic redox evolution. *Chemical Geology* **417**, 148-162 (2015).
52. Corrigan, D., Scott, D. & St. Onge, M.R. Geology of the northern margin of the Trans-Hudson Orogen (Foxe Fold Belt), central Baffin Island, Nunavut. *Geological Survey of Canada Current Research 2001*, **C23**, 1-17 (2001).
53. Clowes, R.M. & Roy, B. Crustal structure of the metasedimentary Kiseynew domain and bounding volcanic – plutonic domains, Trans-Hudson orogen, Canada. *Canadian Journal of Earth Sciences* **58**, doi.org/10.1139/cjes-2020-0062 (2020).
54. Couëslan, C.G. Evaluation of graphite- and vanadium bearing drillcore from the Huzyk Creek property, sub-Phanerozoic Kiseynew domain, central Manitoba (NTS 63J6). Report of Activities 2019, Manitoba Agriculture and Resource Development, Manitoba Geological Survey, 60–71 (2019).
55. Strauss, H. Carbon and sulfur isotopes in Precambrian sediments from the Canadian Shield. *Geochimica et Cosmochimica Acta* **50**, 2653-2662 (1986).
56. Schulz, K.J. & Cannon, W.F. The Penokean orogeny in the Lake Superior region. *Precambrian Research* **157**, 4-25 (2007).
57. McSwiggen, P.L. & Morey, G.B. Geology and geochemical attributes of graphitic rocks in east-central Minnesota. *Minnesota Geological Survey Information Circular* **28** (1989).
58. Wunderman, R.L., Wannamaker, P.E. & Young, C.T. Architecture of the hidden Penokean terrane suture and Midcontinent rift system overprint in eastern Minnesota and western Wisconsin from magnetotelluric profiling. *Lithosphere* **10**, 291-300 (2018).
59. Klasner, J.S., Ojakangas, R.W., Schulz, K.J. & Laberge, G. Nature and style of deformation in the foreland of the early Proterozoic Penokean Orogen, Northern Michigan. *United States Geological Survey Bulletin*, **1904-K** (1991).
60. Wardle, R.J. & van Kranendonk, M.J. The Palaeoproterozoic Southeastern Churchill Province of Labrador-Quebec, Canada: orogenic development as a consequence of oblique collision and indentation. *Geological Society, London, Special Publication* **112**, 137-153 (1996).
61. Mariga, J., Ripley, E.M. & Li, C. Petrologic evolution of gneissic xenoliths in the Voisey's Bay Intrusion, Labrador, Canada: Mineralogy, reactions, partial melting, and mechanisms of mass transfer. *Geochemistry Geophysics Geosystems* **7**, Q05013, doi:10.1029/2005GC001184 (2006).
62. Ripley, E.M., Li, C. & Shin, D. Paragneiss assimilation in the genesis of magmatic Ni-Cu-Co sulphide mineralization at Voisey's Bay, Labrador:  $\delta^{34}\text{S}$ ,  $\delta^{13}\text{C}$ , and Se/S evidence. *Economic Geology* **97**, 1307-1318 (2002).
63. Rivers, T., Mengel, F., Scott, D.J., Campbell, L.M. & Goulet, N. Torngat Orogen - a Palaeoproterozoic example of a narrow doubly vergent collisional orogeny. In Brewer, T.S. (ed.), *Precambrian Crustal Evolution in the North Atlantic Region*, Geological Society Special Publication **112**, 117-136 (1996).
64. Lahtinen R., Garde A. A. & Melezhik, V. A. Paleoproterozoic evolution of Fennoscandia and Greenland. *Episodes* **31**, 20–28 (2008).

65. Nutman, A.P., Dawes, P.R., Kalsbeek, F. & Hamilton, M.A. Palaeoproterozoic and Archaean gneiss complexes in northern Greenland: Palaeoproterozoic terrane assembly in the High Arctic. *Precambrian Research* **161**, 419-451 (2008).
66. Thrane, K. & Kalvig, P. Graphite potential in Greenland. *Geological Survey of Denmark and Greenland, Geology and Ore* **32**, 1-12 (2019).
67. Rosing-Schow, N. et al. Hydrothermal flake graphite mineralisation in Paleoproterozoic rocks of south-east Greenland. *Mineralium Deposita* **52**, 769-789 (2017).
68. Kolb, J. Structure of the Palaeoproterozoic Nagssugtoqidian Orogen, South-east Greenland: Model for the tectonic evolution. *Precambrian Research* **255**, 809-822 (2014).
69. Kolb, J., Stensgaard, B.M. & Kokfelt, T.F. Geology and Mineral Potential of South-East Greenland. *Geological Survey of Denmark and Greenland, Report* **2016/38** (2016).
70. Steenfelt, A., Kolb, J. & Thrane, K. Metallogeny of South Greenland: A review of geological evolution, mineral occurrences and geochemical exploration data. *Ore Geology Reviews* **77**, 194-245 (2016).
71. Bondesen, E., Raunsgaard Petersen, K. & Jørgensen, O. Precambrian organisms and the isotopic composition of organic remains in the Ketilidian of South-West Greenland. *Grønlands Geol. Unders. Bull.* **164**, nr. 4. (1967).
72. Garde, A.A., Chadwick, B., Grocott, J. & Swager, C. Metasedimentary rocks, intrusions and deformation history in the south-east part of the c. 1800 Ma Ketilidian orogen, South Greenland: Project SUPRASVD 1996. *Geology of Greenland Survey Bulletin* **176**, 60–65 (1997).
73. Park, R.G. The Lewisian terrane model: a review. *Scottish Journal of Geology* **41**, 105-118 (2005).
74. Park, R.G., Tarney, J., Connelly, J. N. The Loch Maree Group: Palaeoproterozoic subductionaccretion complex in the Lewisian of NW Scotland. *Precambrian Research* **105**, 205-226 (2001).
75. Parnell, J., Brolly, C. & Boyce, A.J. Mixed metamorphic and fluid graphite deposition in Palaeoproterozoic supracrustal rocks of the Lewisian Complex, NW Scotland. *Terra Nova*, doi.org/10.1111/ter.12546 (2021).
76. Palosaari, J., Latonen, R-M., Smått, J-H., Raunio, S. & Eklund, O. The flake graphite prospect of Piippumäki—an example of a high-quality graphite occurrence in a retrograde metamorphic terrain in Finland. *Mineralium Deposita* **55**, 1647-1660 (2020).
77. Bergmann, S. Geology of the Northern Norrbotten ore province, northern Sweden. *Sveriges Geologiska Undersökning Rapporter och Meddelanden* **141** (2018).
78. Gautneb, H. et al. The graphite occurrences of Northern Norway, a review of geology, geophysics, and resources. *Minerals*, **10**, 626; <https://doi.org/10.3390/min10070626> (2020).
79. Korja, T. Electrical conductivity distribution of the lithosphere in the central Fennoscandian Shield. *Precambrian Research* **64**, 85-108 (1993).
80. Terentiev, R.A. & Santosh, M. Clinopyroxenites (diopsidites) and metabasites from the East Sarmatian Orogen, East European Craton. *Geological Journal* **52**, 745-767 (2016).
81. Savko, K.A., Korish, E. Kh., Pilyugin, S.M. & Polyakova, T.N. Phase relations of REE-bearing minerals during the metamorphism of carbonaceous shales in the Tim-Yastrebovskaya structure, Voronezh Crystalline Massif, Russia. *Petrology* **18**, 384-415 (2010).
82. Strauss, H. et al. Enhanced accumulation of organic matter: The Shunga Event. In: Melezhik, V.A. (ed) *Reading the Archive of Earth's Oxygenation, Volume 3: Global Events and the Fennoscandian Arctic Russia – Drilling Early Earth Project*. Springer-Verlag, Berlin, 1195-1273 (2013).

83. Savko, K.A., Samsonov, A.V., Sal'nikova, E.B., Kotov, A.B. & Bazikov, N.S. HT/LP metamorphic zoning in the Eastern Voronezh Crystalline Massif: Age and parameters of metamorphism and its geodynamic environment. *Petrology* **23**, 559-575 (2015).
84. Perrouty, S. et al. Revised Eburnean geodynamic evolution of the gold-rich southern Ashanti Belt, Ghana, with new field and geophysical evidence of pre-Tarkwaian deformations. *Precambrian Research* **204-205**, 12-39 (2012).
85. Kríbek, B. et al. The origin and hydrothermal mobilization of carbonaceous matter associated with Paleoproterozoic orogenic-type gold deposits of West Africa. *Precambrian Research* **270**, 300-317 (2015).
86. Feybesse, J-L. & Milési, J-P. The Archaean/Proterozoic contact zone in West Africa: a mountain belt of décollement thrusting and folding on a continental margin related to 2.1 Ga convergence of Archaean cratons? *Precambrian Research* **69**, 199-227 (1994).
87. Weber, F., Gauthier-Lafaye, F., Whitechurch, H., Ulrich, M. & El Albani, A. The 2-Ga Eburnean Orogeny in Gabon and the opening of the Francevillian intracratonic basins: A review. *Comptes Rendus Geoscience* **348**, 572-586 (2016).
88. Weber, F. & Gauthier-Lafaye, F. No proof from carbon isotopes in the Francevillian (Gabon) and Onega (Fennoscandian shield) basins of a global oxidation event at 1980–2090 Ma following the Great Oxidation Event (GOE). *Comptes Rendus Geoscience* **345**, 28-35 (2013).
89. Pambo, F. et al. The Proterozoic Franceville Basin (S.E. Gabon): an example of interaction between marine sedimentation and extensional faulting. *Africa Geoscience Review* **13**, 77-106 (2006).
90. Master, S., Bekker, A. & Hofmann, A.– Type locality for the Lomagundi carbon isotope excursion. *Precambrian Research* **182**, 254-273 (2010).
91. Treloar, P.J. The geological evolution of the Magondi mobile belt, Zimbabwe. *Precambrian Research* **38**, 55-73 (1988).
92. Miranda, D.A., Chaves, A. De O., Campello, M.S. & Ramos, S.L.L de M. Origin and thermometry of graphites from Itapecerica supracrustal succession of the southern São Francisco Craton by C isotopes, X-ray diffraction, and Raman spectroscopy. *International Geological Review* **61**, doi.org/10.1080/00206814.2018.1564073 (2019).
93. Teixeira, W., Oliveira, E.P., Peng, P., Dantas, E.L. & Holland, M.H.B.M. U-Pb geochronology of the 2.0 Ga Itapecerica graphite-rich supracrustal succession in the São Francisco Craton: Tectonic matches with the North China Craton and paleogeographic inferences. *Precambrian Research* **293**, 91-111 (2017).
94. Miranda, D.A., Chaves, A. De O., Dussin, I.A. & Porcher, C.C. Paleoproterozoic khondalites in Brazil: a case study of metamorphism and anatexis in khondalites from Itapecerica supracrustal succession of the southern São Francisco Craton. *International Geological Review* **63**, <https://doi.org/10.1080/00206814.2020.1716273> (2020).
95. De Rezende, L.C., Chaves, A. deO. & Ramos, S.L. L deM. Origin and metamorphism of graphite from Formiga, Minas Gerais (Brazil). *Brazilian Journal of Geology* **51**, doi.org/10.1590/2317-4889202120200083 (2021).
